# Supplementary material for: Working in a cold environment, feeling cold at work and chronic pain: a cross-sectional analysis of the Tromsø Study
Source: PubMed Central journal article supplement — BMJ Open. 2019 Nov 11;9(11):e031248. doi: 10.1136/bmjopen-2019-031248 (PMC6858151; doi:10.1136/bmjopen-2019-031248), 2019-11-11
Supplement: bmjopen-2019-031248.draft_revisions.pdf [file bmjopen-2019-031248.draft_revisions.pdf]

# BMJ Open

BMJ Open is committed to open peer review. As part of this commitment we make the peer review history of every article we publish publicly available.

When an article is published we post the peer reviewers' comments and the authors' responses online. We also post the versions of the paper that were used during peer review. These are the versions that the peer review comments apply to.

The versions of the paper that follow are the versions that were submitted during the peer review process. They are not the versions of record or the final published versions. They should not be cited or distributed as the published version of this manuscript.

BMJ Open is an open access journal and the full, final, typeset and author-corrected version of record of the manuscript is available on our site with no access controls, subscription charges or pay-per-view fees (<http://bmjopen.bmj.com>).

If you have any questions on BMJ Open's open peer review process please email [info.bmjopen@bmj.com](mailto:info.bmjopen@bmj.com)

# BMJ Open

## Working in a cold environment, feeling cold at work and chronic pain: A cross-sectional analysis of The Tromsø Study

|                               |                                                                                                                                                                                                                                                                                                                                                                                                                                                                                                                                                                                                                                                                                                                                                                                            |
|-------------------------------|--------------------------------------------------------------------------------------------------------------------------------------------------------------------------------------------------------------------------------------------------------------------------------------------------------------------------------------------------------------------------------------------------------------------------------------------------------------------------------------------------------------------------------------------------------------------------------------------------------------------------------------------------------------------------------------------------------------------------------------------------------------------------------------------|
| Journal:                      | <i>BMJ Open</i>                                                                                                                                                                                                                                                                                                                                                                                                                                                                                                                                                                                                                                                                                                                                                                            |
| Manuscript ID                 | bmjopen-2019-031248                                                                                                                                                                                                                                                                                                                                                                                                                                                                                                                                                                                                                                                                                                                                                                        |
| Article Type:                 | Research                                                                                                                                                                                                                                                                                                                                                                                                                                                                                                                                                                                                                                                                                                                                                                                   |
| Date Submitted by the Author: | 24-Apr-2019                                                                                                                                                                                                                                                                                                                                                                                                                                                                                                                                                                                                                                                                                                                                                                                |
| Complete List of Authors:     | Farbu, Erlend; UiT Norges arktiske universitet, Department of Community Medicine<br>Skandfer, Morten; UiT Norges arktiske universitet, Department of Community Medicine<br>Nielsen, Christopher ; Norwegian Institute of Public Health, Department of Chronic Diseases and Ageing; Oslo Universitetssykehus, Department of Pain Management and Research<br>Brenn, Tormod; UiT Norges arktiske universitet, Department of Community Medicine<br>Stubhaug, Audun; Oslo Universitetssykehus, Department of Pain Management and Research; University of Oslo Faculty of Medicine, Institute of Clinical Medicine<br>Höper, Anje; UiT Norges arktiske universitet, Department of Community Medicine; University Hospital of North Norway, Department of Occupational and Environmental Medicine |
| Keywords:                     | EPIDEMIOLOGY, OCCUPATIONAL & INDUSTRIAL MEDICINE, PUBLIC HEALTH                                                                                                                                                                                                                                                                                                                                                                                                                                                                                                                                                                                                                                                                                                                            |
|                               |                                                                                                                                                                                                                                                                                                                                                                                                                                                                                                                                                                                                                                                                                                                                                                                            |

SCHOLARONE™  
Manuscripts

1  
2  
3 **Working in a cold environment, feeling cold at work and chronic pain: A cross-sectional analysis of**  
4 **The Tromsø Study**  
5

6 Corresponding author :

7 Erlend Hoftun Farbu

8 E-mail: [erlend.h.farbu@uit.no](mailto:erlend.h.farbu@uit.no)

9 Telephone: +47 95233350

10 Postal address: Erlend Hoftun Farbu

11 Institutt for samfunnsmedisin

12 Det helsevitenskapelige fakultet

13 UiT Norges arktiske universitet

14 9037 TROMSØ

15 NORWAY  
16  
17  
18  
19

20 Co-Authors

21 Morten Skandfer

22 Department of Community Medicine, UiT- The Arctic University of Norway, Tromsø, Norway

23 Christopher Sivert Nielsen

24 Department of Chronic Diseases and Ageing, Norwegian Institute of Public Health, Oslo,  
25 Norway

26 Department of Pain Management and Research, Oslo University Hospital, Oslo, Norway

27 Department of Community Medicine, UiT- The Arctic University of Norway, Tromsø, Norway

28 Tormod Brenn

29 Department of Community Medicine, UiT- The Arctic University of Norway, Tromsø, Norway

30 Audun Stubhaug

31 Department of Pain Management and Research, Oslo University Hospital, Oslo, Norway

32 Institute of Clinical Medicine, Faculty of Medicine, University of Oslo, Oslo, Norway

33 Anje Christina Höper

34 Department of Community Medicine, UiT- The Arctic University of Norway, Tromsø, Norway

35 Department of Occupational and Environmental Medicine, University Hospital of North  
36 Norway, Tromsø, Norway

37 Word count: 3463

38 Key words: Chronic pain, cold environment  
39  
40  
41  
42  
43  
44  
45  
46  
47  
48  
49  
50  
51  
52  
53  
54  
55  
56  
57  
58  
59  
60

## Abstract

**Aim:** The main aim of this study was to investigate if working in a cold environment and feeling cold at work are associated with chronic pain (i.e. lasting  $\geq 3$  months). We also aimed to describe the prevalence of other health complaints related to cold exposure.

**Methods:** We used data from the sixth survey (2007-2008) of the Tromsø Study. Analyses included 6533 men and women aged 30-67 years who were not retired, not receiving full-time disability benefits, and had no missing values. Associations between working in a cold environment, feeling cold at work, and self-reported chronic pain were examined with logistic regression adjusted for age, sex, education, body mass index, insomnia, physical activity at work, leisure time physical activity, and smoking.

**Results:** 779 participants reported working in a cold environment  $\geq 25\%$  of the time. This exposure was positively associated with pain at  $\geq 3$  sites (OR 1.57; 95% CI 1.23 to 2.01) and with neck, shoulder, and leg pain, but not with pain at 1-2 sites. Feeling cold sometimes or often at work was associated with pain at  $\geq 3$  sites (OR 1.58; 95% CI 1.22 to 2.07 and OR 3.90; 95% CI 2.04 to 7.45, respectively). Feeling cold often at work was significantly and positively associated with pain at all sites except the hand, foot, stomach, and head.

**Conclusion:** Working in a cold environment was significantly associated with chronic pain. The observed association was strongest for pain at musculoskeletal sites and for those who often felt cold at work.

## Article Summary

### Strengths and limitations of this study

- The study has a high response rate (65.7%) which increases the likelihood that it is a representative sample of the working population
- The observed associations in the present study are consistent for pain at multiple sites and at specific sites
- The healthy worker effect may cause an underestimation of the associations
- The results are to some extent vulnerable to residual confounding by other occupational risk factors

## INTRODUCTION

By evolution, humans are not physiologically fit to live in cold environments. To survive in such environments, we must use different strategies, such as insulating clothing, houses, and heating, which protect us from low temperatures. However, these protective measures may not be sufficient, as there is an excess of deaths recorded during the winter season. This excess is only partly explained by seasonal diseases and thus indicates that even moderately cold temperatures induce a strain on the body and negatively affect health.[1]

Cold exposure can cause pain. Indeed, immersing one's hand in cold water is commonly used as a test of pain tolerance.[2] Exposure to a cold environment, at work or during leisure time, can cause one to experience acute pain. In Finland, the reported prevalence of musculoskeletal pain believed by respondents to be caused by cold exposure is as high as 30% for men and 27% for women.[3, 4] Cold exposure is also known to reduce both physical and cognitive performance.[5, 6] Cold temperatures may also have sub-acute effects. Working in a cold environment has been found to be associated with an increased prevalence of back, neck, and shoulder pain.[7-10] In addition, it has been suggested that working in a cold environment is related to respiratory, cardiovascular, and dermatological complaints and diseases.[11]

Factors that affect workers' thermal balance are contact with water or cold surfaces, humidity, air velocity, radiation, type of clothing, and the heat produced by executing the work.[12] A cold working environment is defined as an environment with an ambient temperature below 10° C.[13] However, the ambient air temperature might not be a good measure of a worker's heat loss. In a study of seafood-processing workers, no relationship was found between workers' reports of feeling cold and measured air velocity, air temperature at the feet, or air temperature 1.1 meters above the floor.[14] This indicates that actual cold exposure is difficult to measure. Some studies have circumvented this problem by using self-reported cold experience as a measure of cold exposure.[15, 16] Among workers in the food processing industry, self-reported experiences of cooling of the neck, shoulder, wrist, and lower back were associated with a self-reported disadvantage in daily routines

1  
2  
3 due to pain at those sites.[15] In a study of seafood industry workers, feeling cold often at work was  
4  
5 associated with musculoskeletal pain.[16] Feeling cold often at work has also been associated with  
6  
7 an increased prevalence of symptoms from skin and airways.[14]  
8  
9

10 These previous studies mostly used musculoskeletal pain over the last 12 months as the  
11  
12 outcome. This includes acute periods of pain within the past 12 months, but contributes no  
13  
14 information about the duration of pain. Chronic pain, defined as pain lasting 3 months or longer, may  
15  
16 be a better measure of the impact on quality of life and future work ability.[17, 18] However, there is  
17  
18 a lack of studies on the association between cold exposure and chronic musculoskeletal pain or pain  
19  
20 in other tissues. Therefore, the main aim of this study was to investigate if working in a cold  
21  
22 environment and feeling cold at work are associated with chronic pain. We also aimed to describe  
23  
24 the prevalence of other health complaints related to cold exposure.  
25  
26  
27  
28  
29  
30  
31  
32  
33  
34  
35  
36  
37  
38  
39  
40  
41  
42  
43  
44  
45  
46  
47  
48  
49  
50  
51  
52  
53  
54  
55  
56  
57  
58  
59  
60

## METHODS

### Participants

The Tromsø Study is a prospective cohort study performed in the municipality of Tromsø in Northern Norway. The study currently consists of seven surveys, with the first conducted in 1974 and the seventh in 2015-2016. Tromsø has a coastal climate; the outdoor temperature is below 10° C for a major part of the year and seldom falls below -10° C.[19] This study includes participants from the sixth survey of the Tromsø Study (Tromsø 6), which was carried out in 2007-2008 and encompassed physical examinations and extensive health questionnaires.[20] Of the 19,762 individuals invited to Tromsø 6, 12,984 (65.7%) participated. The age of the participants ranged from 30 to 87 years. We excluded participants who were retired, were above retirement age (i.e. 67 years), on full-time disability benefits, and those with missing values. Thus, the final study population comprised 6,533 men and women (Figure 1). The Regional Committee of Research Ethics approved Tromsø 6 and this particular analysis.

### Pain

Participants were asked if they had persistent pain lasting 3 months or more (yes/no) and if so, at which anatomical site the pain was situated. The alternatives were jaw, neck, back, shoulder, arm (including elbow), hand, hip, leg (including thigh, knee, and calves), foot (including ankle), head (including face), chest, stomach, genitals, skin, and other. Sites where participants reported pain were then counted, and participants were categorized as having: no pain, pain at 1-2 sites, and pain at  $\geq 3$  sites.

### Cold exposure and cold-related health complaints

The Tromsø 6 questionnaire included the question "Do you work outdoors at least 25% of the time or in cold buildings (e.g. storage/industry buildings)?" Those who answered "Yes" were given an extra set of questions about working in a cold environment in the second questionnaire. Among those questions were "Do you feel cold at work?" (yes, often/yes, sometimes/no, never). Participants were also asked if they had experienced cold-related itching and/or rash (yes/no), and if they experienced



1  
2  
3 any of the following cold-related symptoms while working in cold environments: breathing  
4  
5 difficulties, wheezing, mucus secretion from the lungs, chest pain, arrhythmia, circulatory  
6  
7 disorders/disturbance in hands or feet, temporary impaired vision, temporary migraine, fingers  
8  
9 turning white temporarily, and fingers turning blue/blue-red temporarily (yes/no). The questionnaire  
10  
11 also contained questions on how working in a cold environment and cold-related symptoms affected  
12  
13 participants' concentration, memory, finger sensitivity, finger dexterity, control of movement (for  
14  
15 example, shivering), heavy physical work, or long-lasting physical work. The response alternatives  
16  
17 where "reduced", "unchanged" and "improved"; improved and unchanged were combined due to  
18  
19 few responses in the improved category.  
20  
21  
22

### 23 **Confounders**

24  
25 Possible confounders obtained from the questionnaires were age, sex, education, insomnia, physical  
26  
27 activity at work, leisure time physical activity, and smoking. Body mass index (BMI) was calculated  
28  
29 from weight and height measured at the examination. BMI was categorized into underweight/normal  
30  
31 weight ( $<25 \text{ kg/m}^2$ ), overweight ( $\geq 25 \text{ kg/m}^2$  and  $<30 \text{ kg/m}^2$ ) and obese ( $\geq 30 \text{ kg/m}^2$ ) in the descriptive  
32  
33 statistics, but it was included as a continuous variable in the regression analysis. Insomnia was  
34  
35 assessed by the question "In the past 12 months, how often have you suffered from sleeplessness?"  
36  
37 (never, or just a few times a year/1-3 times a month/approximately once a week/more than once a  
38  
39 week). Physical activity at work was measured with the question "If you have paid or unpaid work,  
40  
41 which statement describes your work best?" (mostly sedentary/requires a lot of walking/requires a  
42  
43 lot of walking and lifting/heavy manual labor). Leisure time physical activity had four categories:  
44  
45 sedentary, low, moderate, and hard. Sedentary was described as "reading, watching TV, or other  
46  
47 sedentary activity", low as "walking, cycling, or other forms of exercise at least 4 hours per week",  
48  
49 moderate as "recreational sports, heavy gardening for at least 4 hours per week", and hard as "hard  
50  
51 training or sports competition, regularly several times per week". Smoking was categorized into  
52  
53 current, former, and never smoker.  
54  
55  
56  
57  
58  
59  
60

### Statistics

Pearson chi-square was used to test differences in prevalence if all cells had  $n > 5$ ; Fisher's exact test was used if  $n \leq 5$ . T-test was used for age. Multivariable logistic regression was used to assess the association between working in a cold environment  $\geq 25\%$  of the time and self-reported pain. All statistical analyses were performed in Stata MP 15.

### Patient and Public Involvement

There were no patient or public involvement in this particular sub study.

For peer review only

## RESULTS

### Participants

Among the 6,533 participants included in the study, 779 reported to work in a cold environment  $\geq 25\%$  of the time. These individuals were younger, were mostly men, had lower levels of education compared to the rest of the working population, and had a higher BMI. They were also more likely to have physically demanding work, have lower levels of leisure time physical activity and to be current or former smokers (Table 1).

Table 1 Characteristics of the study population

|                                                        | Working in a cold environment $\geq 25\%$ of the time |      |            |      | t/ $\chi^2$ |
|--------------------------------------------------------|-------------------------------------------------------|------|------------|------|-------------|
|                                                        | No, n=5754                                            |      | Yes, n=779 |      |             |
|                                                        | n                                                     | %    | n          | %    | p-value     |
| <b>Age (years)*</b>                                    | 49.9                                                  | 8.8  | 48.8       | 8.7  | <0.001      |
| <b>Sex</b>                                             |                                                       |      |            |      |             |
| Female                                                 | 3178                                                  | 55.2 | 143        | 18.4 |             |
| Male                                                   | 2576                                                  | 44.8 | 636        | 81.6 | <0.001      |
| <b>Education</b>                                       |                                                       |      |            |      |             |
| Primary/secondary                                      | 727                                                   | 12.6 | 262        | 33.6 |             |
| Technical school                                       | 1261                                                  | 21.9 | 308        | 39.5 |             |
| High school                                            | 513                                                   | 8.9  | 75         | 9.6  |             |
| College/university <4 years                            | 1350                                                  | 23.5 | 94         | 12.1 |             |
| College/university $\geq 4$ years                      | 1903                                                  | 33.1 | 40         | 5.1  | <0.001      |
| <b>Body mass index</b>                                 |                                                       |      |            |      |             |
| Under and normal weight (<25 kg/m <sup>2</sup> )       | 2233                                                  | 38.8 | 205        | 26.3 |             |
| Overweight ( $\geq 25$ and <30 kg/m <sup>2</sup> )     | 2494                                                  | 43.3 | 406        | 52.1 |             |
| Obese ( $\geq 30$ kg/m <sup>2</sup> )                  | 1027                                                  | 17.8 | 168        | 21.6 | <0.001      |
| <b>Insomnia</b>                                        |                                                       |      |            |      |             |
| Never, or just a few times a year                      | 3927                                                  | 68.2 | 576        | 73.9 |             |
| 1-3 times a month                                      | 1042                                                  | 18.1 | 118        | 15.1 |             |
| Approximately once a week                              | 365                                                   | 6.3  | 42         | 5.4  |             |
| More than once a week                                  | 420                                                   | 7.3  | 43         | 5.5  | 0.014       |
| <b>Physical activity at work</b>                       |                                                       |      |            |      |             |
| Mostly sedentary work                                  | 3497                                                  | 60.8 | 87         | 11.2 |             |
| Work that requires a lot of walking                    | 1454                                                  | 25.3 | 176        | 22.6 |             |
| Work that requires a lot of walking and lifting (n, %) | 760                                                   | 13.2 | 379        | 48.7 |             |
| Heavy manual labor                                     | 43                                                    | 0.7  | 137        | 17.6 | <0.001      |
| <b>Leisure time physical activity</b>                  |                                                       |      |            |      |             |
| Sedentary                                              | 1081                                                  | 18.8 | 186        | 23.9 |             |
| Low                                                    | 3350                                                  | 58.2 | 410        | 52.6 |             |
| Moderate                                               | 1176                                                  | 20.4 | 174        | 22.3 |             |

Hard 147 2.6 9 1.2 <0.001

**Smoking**

|         |      |      |     |      |        |
|---------|------|------|-----|------|--------|
| Current | 1111 | 19.3 | 211 | 27.1 |        |
| Former  | 2227 | 38.7 | 319 | 40.9 |        |
| Never   | 2416 | 42   | 249 | 32   | <0.001 |

\*Numbers are mean and standard deviation for age, otherwise n and %.

Out of the 779 workers who reported working in a cold environment  $\geq 25\%$  of the time, 92 never felt cold at work, 635 felt cold sometimes, and 52 felt cold often. The prevalence of chronic pain at different anatomical sites was higher in those who often or sometimes felt cold at work compared to those who never felt cold (Table 2).

Table 2 Prevalence of chronic pain in participants working in a cold environment <25% of the time and in those working in a cold environment  $\geq 25\%$  of the time by frequency of feeling cold

| Anatomical sites                 | Working in a cold environment <25% of the time<br>n=5754 |    | Frequency of feeling cold at work among those working in a cold environment $\geq 25\%$ of the time<br>n=779. |    |                  |    |             |    |
|----------------------------------|----------------------------------------------------------|----|---------------------------------------------------------------------------------------------------------------|----|------------------|----|-------------|----|
|                                  |                                                          |    | Never, n=92                                                                                                   |    | Sometimes, n=635 |    | Often, n=52 |    |
|                                  | n                                                        | %  | n                                                                                                             | %  | n                | %  | n           | %  |
| <b>1-2 sites</b>                 | 783                                                      | 14 | 14                                                                                                            | 15 | 91               | 14 | 8           | 15 |
| <b><math>\geq 3</math> sites</b> | 904                                                      | 16 | 7                                                                                                             | 8  | 128              | 20 | 21          | 40 |
| <b>Neck</b>                      | 765                                                      | 13 | 8                                                                                                             | 9  | 106              | 17 | 18          | 35 |
| <b>Back</b>                      | 811                                                      | 14 | 6                                                                                                             | 7  | 106              | 17 | 14          | 27 |
| <b>Shoulder</b>                  | 753                                                      | 13 | 8                                                                                                             | 9  | 113              | 18 | 18          | 35 |
| <b>Arm</b>                       | 465                                                      | 8  | 6                                                                                                             | 7  | 69               | 11 | 11          | 21 |
| <b>Hand</b>                      | 341                                                      | 6  | 3                                                                                                             | 3  | 39               | 6  | 6           | 12 |
| <b>Hip</b>                       | 514                                                      | 9  | 7                                                                                                             | 8  | 49               | 8  | 9           | 17 |
| <b>Leg</b>                       | 557                                                      | 10 | 7                                                                                                             | 8  | 76               | 12 | 13          | 25 |
| <b>Foot</b>                      | 385                                                      | 7  | 3                                                                                                             | 3  | 36               | 6  | 4           | 8  |
| <b>Head</b>                      | 318                                                      | 6  | 0                                                                                                             | 0  | 32               | 5  | 7           | 14 |
| <b>Stomach</b>                   | 210                                                      | 4  | 1                                                                                                             | 1  | 27               | 4  | 5           | 10 |

## Multiple pain sites

Working in a cold environment  $\geq 25\%$  of the time was significantly associated with pain at  $\geq 3$  sites after adjustment (odds ratio [OR] 1.57; 95% confidence interval [CI] 1.23 to 2.01) (Table 3).

Table 3 Logistic regression analysis with pain at 1-2 or  $\geq 3$  sites and specific pain sites as outcomes

| Anatomical sites                   | Working in a cold environment <25% of the time<br>n = 5754 |    | Working in a cold environment $\geq 25\%$ of the time<br>n = 779 |                          |             |             |                       |             |             |
|------------------------------------|------------------------------------------------------------|----|------------------------------------------------------------------|--------------------------|-------------|-------------|-----------------------|-------------|-------------|
|                                    | n                                                          | OR | n                                                                | Adjusted for age and sex |             |             | Fully adjusted model* |             |             |
|                                    |                                                            |    |                                                                  | OR                       | 95% CI      |             | OR                    | 95% CI      |             |
| <b>1-2 sites †</b>                 | 783                                                        | 1  | 113                                                              | <b>1.15</b>              | <b>0.92</b> | <b>1.44</b> | 0.95                  | 0.73        | 1.24        |
| <b><math>\geq 3</math> sites ‡</b> | 904                                                        | 1  | 156                                                              | <b>2.02</b>              | <b>1.64</b> | <b>2.48</b> | <b>1.57</b>           | <b>1.23</b> | <b>2.01</b> |
| <b>Neck</b>                        | 765                                                        | 1  | 132                                                              | <b>1.78</b>              | <b>1.44</b> | <b>2.20</b> | <b>1.46</b>           | <b>1.13</b> | <b>1.89</b> |
| <b>Back</b>                        | 811                                                        | 1  | 126                                                              | <b>1.38</b>              | <b>1.12</b> | <b>1.71</b> | 1.18                  | 0.91        | 1.52        |
| <b>Shoulder</b>                    | 753                                                        | 1  | 139                                                              | <b>1.96</b>              | <b>1.58</b> | <b>2.42</b> | <b>1.39</b>           | <b>1.08</b> | <b>1.78</b> |
| <b>Arm</b>                         | 465                                                        | 1  | 86                                                               | <b>1.93</b>              | <b>1.49</b> | <b>2.50</b> | 1.34                  | 0.98        | 1.83        |
| <b>Hand</b>                        | 341                                                        | 1  | 48                                                               | <b>1.66</b>              | <b>1.19</b> | <b>2.32</b> | 1.16                  | 0.79        | 1.71        |
| <b>Hip</b>                         | 514                                                        | 1  | 65                                                               | <b>1.59</b>              | <b>1.19</b> | <b>2.12</b> | 1.26                  | 0.90        | 1.75        |
| <b>Leg</b>                         | 557                                                        | 1  | 96                                                               | <b>1.87</b>              | <b>1.47</b> | <b>2.40</b> | <b>1.47</b>           | <b>1.10</b> | <b>1.96</b> |
| <b>Foot</b>                        | 385                                                        | 1  | 43                                                               | 1.16                     | 0.83        | 1.63        | 0.80                  | 0.54        | 1.19        |
| <b>Head</b>                        | 318                                                        | 1  | 39                                                               | 1.28                     | 0.89        | 39          | 1.13                  | 0.75        | 1.70        |
| <b>Stomach</b>                     | 210                                                        | 1  | 33                                                               | 1.42                     | 0.96        | 33          | 1.30                  | 0.82        | 2.04        |

\* Adjusted for age, sex, education, body mass index, insomnia, physical activity at work, leisure time physical activity, and smoking

† Model does not include those with pain at  $\geq 3$  sites

‡ Model does not include those with pain at 1-2 sites

OR: odds ratio, CI: confidence interval.

However, in the fully-adjusted model, those who worked in a cold environment  $\geq 25\%$  of the time did not have higher odds for pain at 1-2 sites compared to those who worked in a cold environment <25% of the time. When those who worked in a cold environment  $\geq 25\%$  were divided into never,

1  
2  
3 sometimes, and often feeling cold at work, both sometimes and often feeling cold was associated  
4 with pain at  $\geq 3$  sites (OR 1.58; 95% CI 1.22 to 2.07 and OR 3.90; 95% CI 2.04 to 7.45, respectively)  
5  
6  
7 (Figure 2).  
8

### 9 10 **Pain at specific sites**

11  
12 In the analysis with pain at specific sites as outcomes, the low number of participants who worked in  
13 a cold environment  $\geq 25\%$  with pain in the jaw (n=4), chest (n=10), skin (n=5), genitals (n=8), and  
14 other location (n=3) prevented separate analyses for these outcomes. When using pain at the  
15 remaining 10 sites as separate outcomes, working in cold environments  $\geq 25\%$  of the time was  
16  
17 other location (n=3) prevented separate analyses for these outcomes. When using pain at the  
18 remaining 10 sites as separate outcomes, working in cold environments  $\geq 25\%$  of the time was  
19 significantly associated with pain at all sites except the foot, head, and stomach in the model  
20  
21 adjusted for age and sex (Table 3). Although those working in cold environments  $\geq 25\%$  of the time  
22  
23 had higher odds for pain at all sites except the foot in the fully-adjusted model, only the associations  
24  
25 for pain at the neck, shoulder, and leg were statistically significant (Table 3).  
26  
27  
28  
29

30  
31 When those working in cold environments  $\geq 25\%$  of the time were divided by frequency of feeling  
32 cold, those who felt cold sometimes or often at work had significantly higher odds for pain at  
33 musculoskeletal sites compared to those working in a cold environment  $< 25\%$  of the time. In the  
34 model adjusted for age and sex, feeling cold often was significantly associated with head and  
35 stomach pain (Figure 2).  
36  
37  
38  
39

40  
41 After adjusting for possible confounders, workers who felt cold often had higher odds for neck,  
42 shoulder, arm, leg, back, and hip pain compared to the group that worked in a cold environment  
43  
44  
45  
46  
47  
48  
49  
50  
51  
52  
53  
54  
55  
56  
57  
58  
59  
60

Among those working in cold environments  $\geq 25\%$  of the time, the group that reported feeling cold  
sometimes at work had higher odds for neck, shoulder, and leg pain, with ORs between those who  
never felt cold and those who felt cold often at work (Figure 2). In the group working in cold  
environments  $\geq 25\%$  of the time, never feeling cold at work was not significantly associated with  
chronic pain at any specific site in either of the models.

### 60 **Cold-related health complaints**

1  
2  
3 Among those working in cold environments  $\geq 25\%$  of the time, 33% reported they had experienced  
4 circulatory disorders/disturbances in their hands or feet, 26% had their fingers turn white  
5 temporarily, and 19% had their fingers turn blue/blue-red temporarily (Supplementary table 1). The  
6 prevalence of participants who had itching or rash, temporary impaired vision, circulatory  
7 disorders/disturbances in their hands or feet, or fingers turning white or blue/blue-red fingers  
8 temporarily was higher among those who felt cold often compared to those who never felt cold at  
9 work. Over 60% of those working in cold environments  $\geq 25\%$  of the time experienced decreased  
10 finger sensitivity and dexterity. Many workers also reported reduced ability to control their  
11 movement (shivering), perform heavy physical work, and long-lasting physical work, with prevalences  
12 ranging from 23% to 31%. In addition, workers who felt cold often were more likely to report loss of  
13 performance in all domains except memory compared to those who never felt cold at work  
14 (Supplementary table 2).  
15  
16  
17  
18  
19  
20  
21  
22  
23  
24  
25  
26  
27  
28  
29  
30  
31  
32  
33  
34  
35  
36  
37  
38  
39  
40  
41  
42  
43  
44  
45  
46  
47  
48  
49  
50  
51  
52  
53  
54  
55  
56  
57  
58  
59  
60

## DISCUSSION

### Key results

In this study, working in a cold environment  $\geq 25\%$  of the time was associated with chronic pain (i.e. pain lasting  $\geq 3$  months) at the neck, shoulder, and leg, as well as pain at  $\geq 3$  sites, even after adjusting for age, sex, education, BMI, insomnia, physical activity at work, and leisure time physical activity. Those who felt cold often at work had significantly higher odds for pain at  $\geq 3$  sites and for pain at all specified sites except the hand, foot, head, and stomach. Feeling cold sometimes at work was associated with neck, shoulder, and leg pain. We found no significant differences in chronic pain between those who never felt cold when working in a cold environment  $\geq 25\%$  of the time and those who work in cold environment  $< 25\%$  of the time.

The ORs for chronic musculoskeletal pain in the present study were lower than estimates for musculoskeletal pain during the last 12 months from studies of slaughterhouse and seafood industry workers.[15, 16] Interestingly, in the fully-adjusted model, we found no association between working in a cold environment  $\geq 25\%$  of the time and hand and foot pain, although these body parts are the most susceptible to cooling. If cooling of local tissue is the mechanism for a higher prevalence of chronic pain, one could assume that body parts most exposed to cold would be at a higher risk for pain. The results for hand and foot in the present study do not support such an assumption. However, this observation is in contrast to other studies that found associations between a cold environment or an experience of cooling of the wrist and pain in the wrist, hand, and forearm.[7, 15, 21] The difference between earlier findings and the present study might be due to a different etiology and pathology for chronic musculoskeletal pain and 12-month pain prevalence. Different study populations and cold exposures could also contribute to the contradictory results.

Feeling cold is a subjective experience and contains little or no information about the actual environment, such as ambient temperature, humidity, and air velocity. However, ambient temperature could also be a poor measure of cold exposure. A study of seafood industry workers could not establish a simple relationship between thermal environmental factors and the prevalence



1  
2  
3 of workers feeling cold. The same study also found that working in relatively high temperatures (>12°  
4 C) led to low finger temperatures and a major drop in foot temperature.[14] Thermal comfort and  
5 sensation seem to be closely connected to both average skin temperature and rectal  
6 temperature.[22] Although subjective, feeling cold might be a better indication of the environment's  
7 effect on the body than ambient air temperature. In the present study, the higher prevalence of  
8 several cold-related complaints and the higher prevalence of impaired performance among those  
9 who felt cold often, support this notion.

10  
11  
12 The general health status of a person might also influence to what degree they feel cold.  
13 Individuals with diagnosed musculoskeletal disorders are more prone to report cold-related  
14 musculoskeletal pain [23], and male slaughterhouse workers with chronic pain had more complaints  
15 about indoor climate, including complaints about temperatures that were too low and draughts,  
16 when compared to those without pain.[24] Chronic pain could also influence the perception of  
17 feeling cold. The design of the present study is not adequate to address the direction of the observed  
18 association.

19  
20  
21 Few plausible causal mechanisms between cold exposure and musculoskeletal pain, chronic or  
22 not, have been suggested. Studies have found that cooling induces physiological responses, such as a  
23 change in electromyography, poorer energy-efficiency, and increased muscle activity.[25-27]  
24 However, a relationship between altered electromyography, increased muscle activity, and  
25 subsequent chronic pain has not been satisfactorily established. A cross-sectional study of  
26 slaughterhouse workers found that a lower pressure pain threshold was associated with more  
27 complaints about the indoor climate.[24] A possible explanation for the observed association  
28 between chronic pain and frequency of feeling cold in the present study could be that persons who  
29 felt cold have a lower pain threshold than those who did not. Future research should explore  
30 whether this is genetic, or if thermal stimuli could contribute to a sensitization process.

31  
32  
33 The prevalence of cold-related respiratory and cardiovascular health complaints in the present  
34 study are similar to those found in a population sample aged 25-74 years in Finland.[4] However, the  
35  
36  
37  
38  
39  
40  
41  
42  
43  
44  
45  
46  
47  
48  
49  
50  
51  
52  
53  
54  
55  
56  
57  
58  
59  
60

1  
2  
3 prevalence of circulatory disorders/disturbances in the hands or feet, and fingers turning white or  
4  
5 blue/blue-red temporarily was higher among participants who worked in a cold environment  $\geq 25$  of  
6  
7 the time in the present study.  
8

### 9 **Strengths and limitations**

10  
11 In our study, participants who worked in a cold environment  $\geq 25$  of the time had generally low  
12  
13 education and executed a lot of heavy physical work, both of which have been identified as risk  
14  
15 factors for musculoskeletal pain; [28-30] adjusting for these confounders attenuated the associations  
16  
17 in the present study. Workers exposed to cold are also exposed to several other occupational risk  
18  
19 factors that can be associated with poor health, and physical activity at work is not a satisfactory  
20  
21 measure of these risk factors.[31] Consequently, the results are to some extent vulnerable to residual  
22  
23 confounding.  
24  
25

26  
27 Our results could also be influenced by the healthy-worker effect.[32] Feeling cold is  
28  
29 uncomfortable, and individuals negatively affected by a cold environment might change their  
30  
31 occupation or workplace to avoid getting cold. The remaining employees exposed to cold may  
32  
33 therefore be the ones that are the least negatively affected by the cold. Additionally, chronic pain  
34  
35 can contribute to selection bias by having a different impact in different occupations. There is a social  
36  
37 gradient in disability benefits, and physical work has been found to increase the risk for disability  
38  
39 pension, even after adjustment for health status.[33] Thus, the effect estimates may be  
40  
41 underestimated.  
42  
43

44  
45 The high response rate (65.7 %) of Tromsø 6 is a major strength and increases the likelihood that  
46  
47 the findings are representative of the general population. Nevertheless, non-participants in Tromsø 6  
48  
49 tend to have lower education than participants;[20] therefore we cannot rule out that the  
50  
51 prevalence of cold-exposed workers was higher among non-participants. Additionally, some of the  
52  
53 occupations in which workers are typically exposed to cold environments have a high number of  
54  
55 migrant workers, a group not invited to participate in The Tromsø Study. As an example, in 2008 in  
56  
57 Norway, approximately 12% of workers in the construction industry were migrant workers.[34] These  
58  
59  
60

1  
2  
3 aspects may have led to selection bias and thus an underestimation of the proportion of workers  
4  
5 exposed to a cold environment. How this selection bias affects the association between feeling cold  
6  
7 and musculoskeletal pain or cold-related health complaints is not known.  
8

9  
10 A clear limitation of the study is the low number of participants who reported feeling cold often  
11  
12 or never, resulting in large CIs. Also, there were few female participants working in a cold  
13  
14 environment  $\geq 25\%$  of the time (n=123), which prevented any useful analysis stratified by sex. There  
15  
16 are sex differences in types of work, prevalence of cold discomfort or cooling [15], and in the  
17  
18 prevalence of musculoskeletal pain.[30] The association between working in cold environment and  
19  
20 musculoskeletal pain is likely different by sex.  
21  
22

23  
24 The observed associations in the present study are consistent for pain at multiple sites and at  
25  
26 specific sites. Although not all the effect estimates were significant, the direction of the associations  
27  
28 was consistent, with increased pain reporting with increasing experience of cold at work, at all sites  
29  
30 except the hip. This consistency and the high effect estimates indicate that the observed associations  
31  
32 are robust, and that additional adjustment for occupational risk factors would not explain all  
33  
34 associations.  
35

36  
37 Even though Tromsø is situated at 69°N, the climate is relatively mild due to the Gulf Stream.  
38  
39 There are also several factors other than ambient air temperature that can affect a worker's thermal  
40  
41 balance, e.g. amount of protective clothing. At work, individual differences in heat loss, and  
42  
43 protection and adaptations such as behavioral responses, adjusting clothing, or increasing physical  
44  
45 activity, are very difficult to measure and would vary throughout a workday. The heat loss of one  
46  
47 worker in a cold environment may be the same as that of another in a moderately cold environment  
48  
49 if not properly protected. Thus, we believe the results of the present study are not specific to our  
50  
51 study population, but relevant to others working in cold environments, whether they are indoors or  
52  
53 outdoors.  
54  
55  
56  
57  
58  
59  
60

## Conclusion

Working in a cold environment  $\geq 25\%$  of the time was associated with chronic pain at  $\geq 3$  sites, and with neck, shoulder, and leg pain. Those who worked in a cold environment and felt cold often at work had higher odds for neck, shoulder, arm, back, hip, and leg pain compared to those who worked in a cold environment  $< 25\%$  of the time. Working in a cold environment  $\geq 25\%$  of the time and never feeling cold was not associated with pain at any site. Organizing work and workplaces in a way that ensures thermal balance for workers might reduce the risk of chronic pain.

1 Gasparrini A, Guo Y, Hashizume M, et al. Mortality risk attributable to high and low ambient temperature: a multicountry observational study. *Lancet*. 2015;386(9991):369-75 doi:10.1016/s0140-6736(14)62114-0.

2 Modir JG, Wallace MS. Human experimental pain models 2: the cold pressor model. *Methods in molecular biology (Clifton, NJ)*. 2010;617:165-8 doi:10.1007/978-1-60327-323-7\_13.

3 Pienimäki T, Karppinen J, Rintamäki H, et al. Prevalence of cold-related musculoskeletal pain according to self-reported threshold temperature among the Finnish adult population. *Eur J Pain*. 2014;18(2):288-98 doi:10.1002/j.1532-2149.2013.00368.x.

4 Raatikka VP, Rytönen M, Nayha S, et al. Prevalence of cold-related complaints, symptoms and injuries in the general population: the FINRISK 2002 cold substudy. *Int J Biometeorol*. 2007;51(5):441-8 doi:10.1007/s00484-006-0076-1.

5 Mäkinen TM, Palinkas LA, Reeves DL, et al. Effect of repeated exposures to cold on cognitive performance in humans. *Physiology & behavior*. 2006;87(1):166-76 doi:10.1016/j.physbeh.2005.09.015.

6 Pilcher JJ, Nadler E, Busch C. Effects of hot and cold temperature exposure on performance: a meta-analytic review. *Ergonomics*. 2002;45(10):682-98 doi:10.1080/00140130210158419.

7 Pienimäki T. Cold exposure and musculoskeletal disorders and diseases. A review. *Int J Circumpolar Health*. 2002;61(2):173-82

8 Burström L, Jarvholm B, Nilsson T, et al. Back and neck pain due to working in a cold environment: a cross-sectional study of male construction workers. *Int Arch Occup Environ Health*. 2012 doi:10.1007/s00420-012-0818-9.

9 Dovrat E, Katz-Leurer M. Cold exposure and low back pain in store workers in Israel. *Am J Ind Med*. 2007;50(8):626-31 doi:10.1002/ajim.20488.

10 Skandfer M, Talykova L, Brenn T, et al. Low back pain among mineworkers in relation to driving, cold environment and ergonomics. *Ergonomics*. 2014;57(10):1541-8 doi:<http://dx.doi.org/10.1080/00140139.2014.904005>.

11 Mäkinen TM, Hassi J. Health problems in cold work. *Ind Health*. 2009;47(3):207-20 doi:JST.JSTAGE/indhealth/47.207 [pii].

12 Parsons K. Human Thermal Environments: The Effects of Hot, Moderate, and Cold Environments on Human Health, Comfort, and Performance: CRC Press, Inc.; 2014. 635 p.

- 1  
2  
3 13 International Organization of Standardisation ISO 15743:2008 Ergonomics of the thermal  
4 environment - Cold workplaces- Risk assessment and management. Geneva2008.  
5 14 Bang BE, Aasmoe L, Aardal L, et al. Feeling cold at work increases the risk of symptoms from  
6 muscles, skin, and airways in seafood industry workers. *Am J Ind Med.* 2005;47(1):65-71  
7 doi:10.1002/ajim.20109.  
8 15 Sormunen E, Remes J, Hassi J, et al. Factors associated with self-estimated work ability and  
9 musculoskeletal symptoms among male and female workers in cooled food-processing facilities. *Ind*  
10 *Health.* 2009;47(3):271-82  
11 16 Aasmoe L, Bang B, Egeness C, et al. Musculoskeletal symptoms among seafood production  
12 workers in North Norway. *Occup Med (Lond).* 2008;58(1):64-70  
13 17 Skevington SM. Investigating the relationship between pain and discomfort and quality of life,  
14 using the WHOQOL. *Pain.* 1998;76(3):395-406 doi:[https://doi.org/10.1016/S0304-3959\(98\)00072-4](https://doi.org/10.1016/S0304-3959(98)00072-4).  
15 18 Mallen CD, Peat G, Thomas E, et al. Prognostic factors for musculoskeletal pain in primary care: a  
16 systematic review. *The British journal of general practice : the journal of the Royal College of General*  
17 *Practitioners.* 2007;57(541):655-61  
18 19 Weather statistics for Tromsø observation site, Tromsø (Troms) yr.no: The Norwegian  
19 Meteorological Institute; 2018 [cited 2018 13.11]. Available from:  
20 [https://www.yr.no/place/Norway/Troms/Troms%C3%B8/Troms%C3%B8\\_observation\\_site/statistics.](https://www.yr.no/place/Norway/Troms/Troms%C3%B8/Troms%C3%B8_observation_site/statistics.html)  
21 [html.](https://www.yr.no/place/Norway/Troms/Troms%C3%B8/Troms%C3%B8_observation_site/statistics.html)  
22 20 Eggen AE, Mathiesen EB, Wilsgaard T, et al. The sixth survey of the Tromso Study (Tromso 6) in  
23 2007-08: collaborative research in the interface between clinical medicine and epidemiology: study  
24 objectives, design, data collection procedures, and attendance in a multipurpose population-based  
25 health survey. *Scandinavian journal of public health.* 2013;41(1):65-80  
26 doi:10.1177/1403494812469851.  
27 21 Kurppa K, Viikari-Juntura E, Kuosma E, et al. Incidence of tenosynovitis or peritendinitis and  
28 epicondylitis in a meat-processing factory. *Scand J Work Environ Health.* 1991;17(1):32-7  
29 22 Gagge AP, Stolwijk JAJ, Hardy JD. Comfort and thermal sensations and associated physiological  
30 responses at various ambient temperatures. *Environmental research.* 1967;1(1):1-20  
31 doi:10.1016/0013-9351(67)90002-3.  
32 23 Nayha S, Hassi J, Jousilahti P, et al. Cold-related symptoms among the healthy and sick of the  
33 general population: National FINRISK Study data, 2002. *Public Health.* 2011;125(6):380-8  
34 doi:10.1016/j.puhe.2011.02.014.  
35 24 Sundstrup E, Jakobsen MD, Brandt M, et al. Central Sensitization and Perceived Indoor Climate  
36 among Workers with Chronic Upper-Limb Pain: Cross-Sectional Study. *Pain research and treatment.*  
37 2015;2015:793750 doi:10.1155/2015/793750.  
38 25 Oksa J, Sormunen E, Koivukangas U, et al. Changes in neuromuscular function due to  
39 intermittently increased workload during repetitive work in cold conditions. *Scand J Work Environ*  
40 *Health.* 2006;32(4):300-9  
41 26 Sormunen E, Rissanen S, Oksa J, et al. Muscular activity and thermal responses in men and women  
42 during repetitive work in cold environments. *Ergonomics.* 2009;52(8):964-76  
43 doi:10.1080/00140130902767413.  
44 27 Racinais S, Oksa J. Temperature and neuromuscular function. *Scandinavian journal of medicine &*  
45 *science in sports.* 2010;20 Suppl 3:1-18 doi:10.1111/j.1600-0838.2010.01204.x.  
46 28 Lötters F, Burdorf A, Kuiper J, et al. Model for the work-relatedness of low-back pain.  
47 *Scandinavian Journal of Work, Environment and Health.* 2003;29(6):431-40 doi:10.5271/sjweh.749.  
48 29 Hoozemans MJ, Knelange EB, Frings-Dresen MH, et al. Are pushing and pulling work-related risk  
49 factors for upper extremity symptoms? A systematic review of observational studies. *Occup Environ*  
50 *Med.* 2014;71(11):788-95 doi:10.1136/oemed-2013-101837.  
51 30 Andorsen OF, Ahmed LA, Emaus N, et al. A prospective cohort study on risk factors of  
52 musculoskeletal complaints (pain and/or stiffness) in a general population. The Tromso study. *PLoS*  
53 *one.* 2017;12(7):e0181417 doi:10.1371/journal.pone.0181417.  
54  
55  
56  
57  
58  
59  
60

1  
2  
3 31 Niedhammer I, Chastang J-F, David S, et al. The contribution of occupational factors to social  
4 inequalities in health: Findings from the national French SUMER survey. *Social Science & Medicine*.  
5 2008;67(11):1870-81 doi:<https://doi.org/10.1016/j.socscimed.2008.09.007>.

6 32 Li CY, Sung FC. A review of the healthy worker effect in occupational epidemiology. *Occup Med*  
7 *(Lond)*. 1999;49(4):225-9

8 33 Krokstad S, Johnsen R, Westin S. Social determinants of disability pension: a 10-year follow-up of  
9 62 000 people in a Norwegian county population. *Int J Epidemiol*. 2002;31(6):1183-91

10 34 Andersen RK, Jordfald B. Arbeidstakere i byggenæringen i 2008 og 2014. Fafo; 2016. Report No.:  
11 39.  
12  
13  
14  
15  
16  
17  
18  
19  
20  
21  
22  
23  
24  
25  
26  
27  
28  
29  
30  
31  
32  
33  
34  
35  
36  
37  
38  
39  
40  
41  
42  
43  
44  
45  
46  
47  
48  
49  
50  
51  
52  
53  
54  
55  
56  
57  
58  
59  
60

For peer review only

## FIGURE LEGENDS

Figure 1 Flow chart presenting number of subjects invited to Tromsø 6, those who participated in Tromsø 6, and those excluded and included in the present analysis.

Figure 2 Odds ratios with 95% confidence intervals for chronic pain. Working in a cold environment  $\geq 25\%$  of the time and feeling cold never, sometimes, or often compared to those working in a cold environment  $< 25\%$  of the time

### Acknowledgments

#### Contributors

EHF, ACH and MS designed the study. EHF conducted the data analysis and wrote the manuscript with the assistance of ACH and MS. All authors contributed to the interpretation and read and approved the final manuscript. CSN and AS contributed to the data acquisition of questions regarding pain from the 6<sup>th</sup> survey of the Tromsø study.

#### Collaborators

Lisbeth Aasmoe contributed to the data acquisition of questions regarding work in the cold from the 6<sup>th</sup> survey of the Tromsø study.

#### Funding

This particular study have been funded by UiT- The Arctic University of Norway. The sixth survey of The Tromsø Study is a collaboration between the Northern Norway Regional Health Authority, UiT- The Arctic University of Norway, Norwegian Ministry of Health and Care Services, Troms County and the Norwegian Institute of Public Health.

**Competing interests:** None declared

**Data sharing:** All data are available by applying to The Tromsø Study

<http://tromsundersokelsen.uit.no/tromso/>

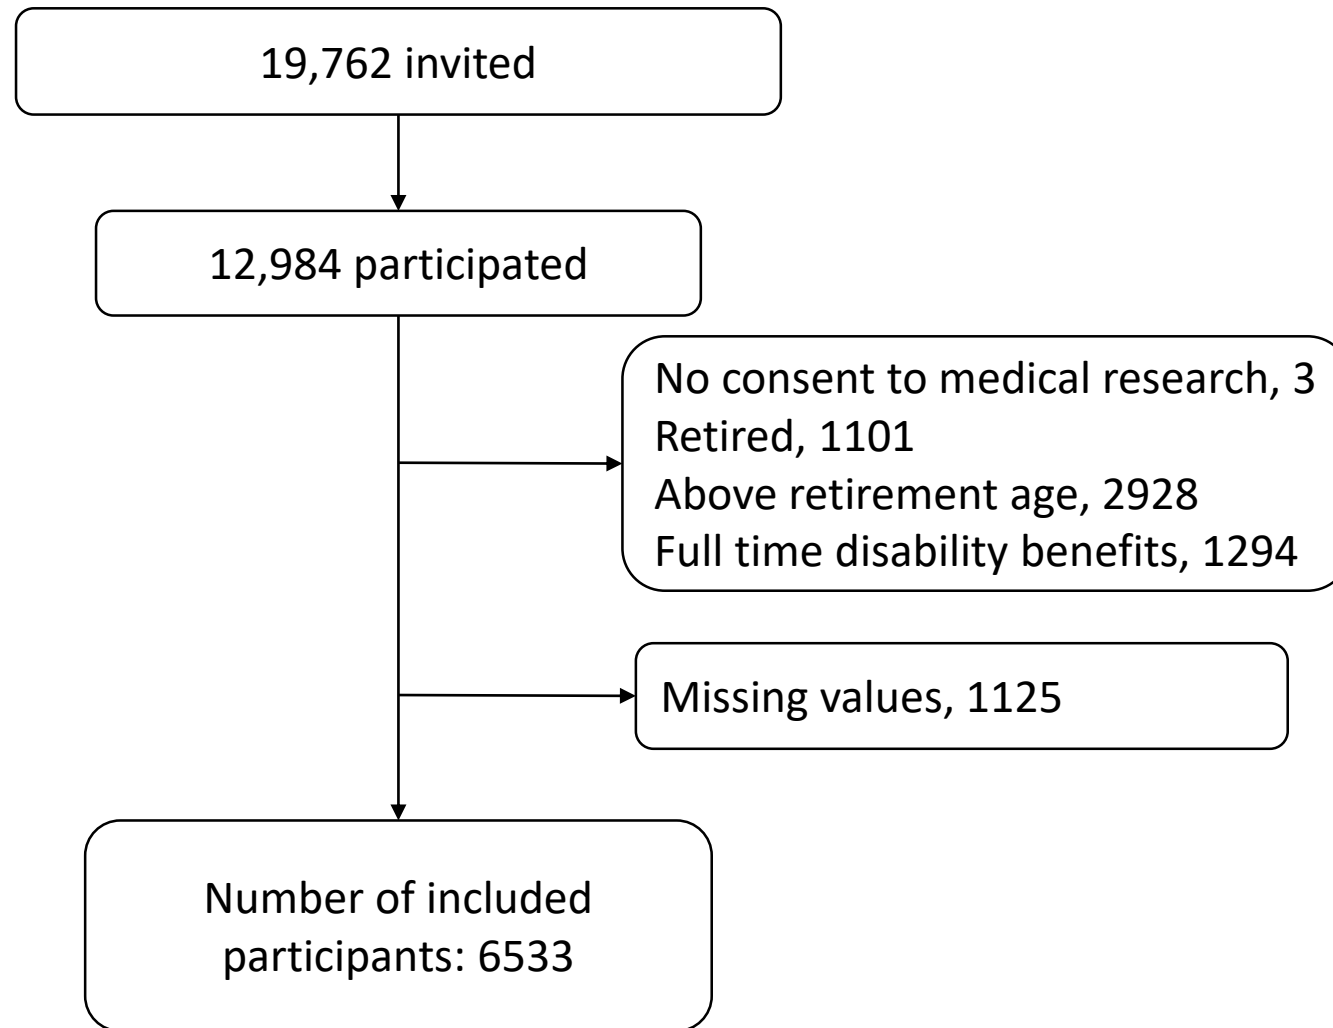



Pain at ≥ 3 sites

1-2 pain sites

Neck

Back

1  
2  
3  
4  
5  
6  
7  
8  
9  
10  
11  
12  
13  
14  
15  
16  
17  
18  
19  
20  
21  
22  
23  
24  
25  
26  
27

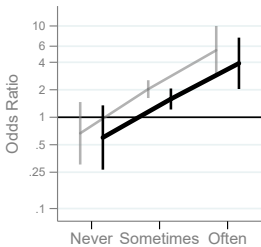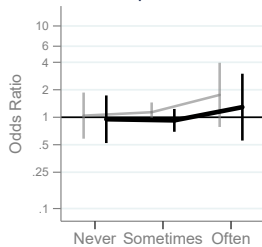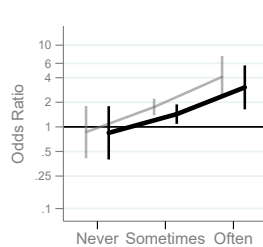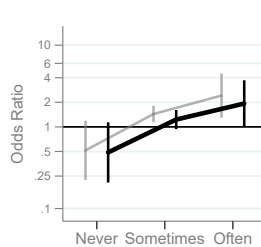

Shoulder

Arm

Hand

Hip

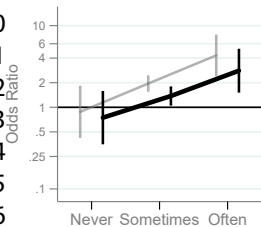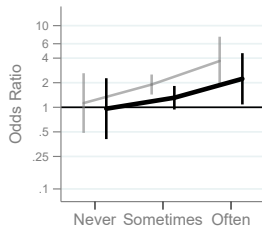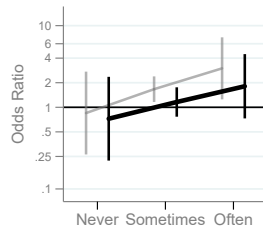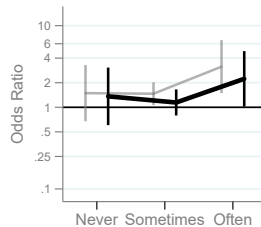

Leg

Foot

Head

Stomach

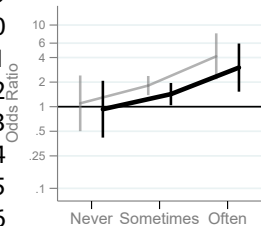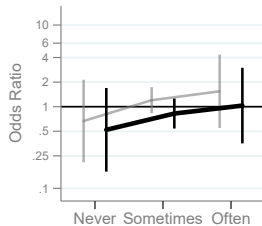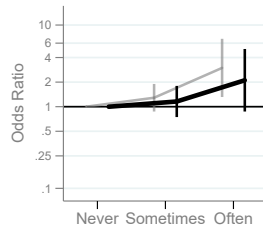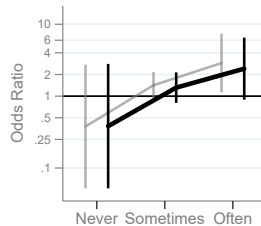

— Adjusted for age and sex

— Adjusted for age, sex, education, body mass index, insomnia, physical activity at work, leisure time physical activity and smoking

32

Supplementary table 1 Cold-related health complaints during or after exposure to a cold environment

|                                                        |       | Working in a cold environment $\geq 25\%$ of the time |    |                    |    |                        |    |                    |    |                         |
|--------------------------------------------------------|-------|-------------------------------------------------------|----|--------------------|----|------------------------|----|--------------------|----|-------------------------|
|                                                        |       | Total                                                 |    | Never feeling cold |    | Feeling cold sometimes |    | Feeling cold often |    | $\chi^2$ /Fischer exact |
|                                                        |       | n                                                     | %  | n                  | %  | n                      | %  | n                  | %  | P                       |
| Itching or rash                                        | Yes   | 103                                                   | 15 | 4                  | 5  | 88                     | 15 | 11                 | 23 | 0.008                   |
|                                                        | Total | 698                                                   |    | 78                 |    | 573                    |    | 47                 |    |                         |
| Breathing difficulties                                 | Yes   | 69                                                    | 10 | 3                  | 4  | 59                     | 11 | 7                  | 16 | 0.091                   |
|                                                        | Total | 666                                                   |    | 72                 |    | 549                    |    | 45                 |    |                         |
| Wheezing                                               | Yes   | 38                                                    | 6  | 4                  | 6  | 30                     | 6  | 4                  | 9  | 0.536                   |
|                                                        | Total | 656                                                   |    | 72                 |    | 540                    |    | 44                 |    |                         |
| Mucus secretion from the lungs                         | Yes   | 35                                                    | 5  | 2                  | 3  | 29                     | 5  | 4                  | 9  | 0.366                   |
|                                                        | Total | 655                                                   |    | 72                 |    | 539                    |    | 44                 |    |                         |
| Chest pain                                             | Yes   | 27                                                    | 4  | 2                  | 3  | 21                     | 4  | 1                  | 2  | 1                       |
|                                                        | Total | 753                                                   |    | 71                 |    | 544                    |    | 42                 |    |                         |
| Arrhythmia                                             | Yes   | 10                                                    | 2  | 1                  | 1  | 8                      | 2  | 1                  | 2  | 0.665                   |
|                                                        | Total | 661                                                   |    | 72                 |    | 545                    |    | 44                 |    |                         |
| Circulatory disorders/<br>disturbance in hands or feet | Yes   | 214                                                   | 33 | 10                 | 14 | 178                    | 33 | 26                 | 59 | <0.001                  |
|                                                        | Total | 658                                                   |    | 72                 |    | 542                    |    | 44                 |    |                         |
| Temporary impaired vision                              | Yes   | 12                                                    | 2  | 0                  | 0  | 8                      | 2  | 4                  | 9  | 0.007                   |
|                                                        | Total | 660                                                   |    | 72                 |    | 544                    |    | 44                 |    |                         |
| Temporary migraine                                     | Yes   | 22                                                    | 3  | 1                  | 1  | 17                     | 3  | 4                  | 9  | 0.072                   |
|                                                        | Total | 659                                                   |    | 71                 |    | 543                    |    | 45                 |    |                         |
| Fingers turning white temporarily                      | Yes   | 174                                                   | 26 | 9                  | 13 | 146                    | 27 | 19                 | 43 | 0.001                   |
|                                                        | Total | 658                                                   |    | 72                 |    | 542                    |    | 44                 |    |                         |
| Fingers turning blue/<br>blue-red temporarily          | Yes   | 118                                                   | 19 | 3                  | 4  | 105                    | 20 | 10                 | 24 | 0.001                   |
|                                                        | Total | 634                                                   |    | 70                 |    | 523                    |    | 41                 |    |                         |

Supplementary table 2 Influence of cold environment and cold-related health complaints on work performance, by frequency of feeling cold

|                            |         | Working in a cold environment $\geq 25\%$ of the time |    |                    |    |                        |    |                    |    |                          |
|----------------------------|---------|-------------------------------------------------------|----|--------------------|----|------------------------|----|--------------------|----|--------------------------|
|                            |         | Total                                                 |    | Never feeling cold |    | Feeling cold sometimes |    | Feeling cold often |    | $\chi^2$ / Fischer exact |
|                            |         | n                                                     | %  | n                  | %  | n                      | %  | n                  | %  | p                        |
| Concentration              |         |                                                       |    |                    |    |                        |    |                    |    |                          |
|                            | Reduced | 86                                                    | 12 | 3                  | 4  | 73                     | 12 | 10                 | 20 |                          |
|                            | Total   | 726                                                   |    | 80                 |    | 597                    |    | 49                 |    | 0.01                     |
| Memory                     |         |                                                       |    |                    |    |                        |    |                    |    |                          |
|                            | Reduced | 17                                                    | 2  | 2                  | 3  | 11                     | 2  | 4                  | 8  |                          |
|                            | Total   | 722                                                   |    | 80                 |    | 593                    |    | 49                 |    | 0.033                    |
| Finger sensitivity         |         |                                                       |    |                    |    |                        |    |                    |    |                          |
|                            | Reduced | 502                                                   | 68 | 44                 | 54 | 416                    | 68 | 42                 | 84 |                          |
|                            | Total   | 743                                                   |    | 81                 |    | 612                    |    | 50                 |    | 0.002                    |
| Finger dexterity           |         |                                                       |    |                    |    |                        |    |                    |    |                          |
|                            | Reduced | 469                                                   | 64 | 39                 | 48 | 392                    | 65 | 38                 | 76 |                          |
|                            | Total   | 736                                                   |    | 81                 |    | 605                    |    | 50                 |    | 0.002                    |
| Control of movement        |         |                                                       |    |                    |    |                        |    |                    |    |                          |
|                            | Reduced | 210                                                   | 29 | 15                 | 18 | 172                    | 29 | 23                 | 48 |                          |
|                            | Total   | 722                                                   |    | 82                 |    | 592                    |    | 48                 |    | 0.002                    |
| Heavy physical work        |         |                                                       |    |                    |    |                        |    |                    |    |                          |
|                            | Reduced | 173                                                   | 24 | 10                 | 13 | 141                    | 24 | 22                 | 46 |                          |
|                            | Total   | 721                                                   |    | 79                 |    | 594                    |    | 48                 |    | <0.001                   |
| Long-lasting physical work |         |                                                       |    |                    |    |                        |    |                    |    |                          |
|                            | Reduced | 226                                                   | 31 | 9                  | 11 | 190                    | 32 | 27                 | 56 |                          |
|                            | Total   | 719                                                   |    | 79                 |    | 592                    |    | 48                 |    | <0.001                   |

STROBE Statement—Checklist of items that should be included in reports of *cross-sectional studies*

|                              | Item No | Recommendation                                                                                                                                                                                    | Page No       |
|------------------------------|---------|---------------------------------------------------------------------------------------------------------------------------------------------------------------------------------------------------|---------------|
| <b>Title and abstract</b>    | 1       | (a) Indicate the study's design with a commonly used term in the title or the abstract                                                                                                            | 1             |
|                              |         | (b) Provide in the abstract an informative and balanced summary of what was done and what was found                                                                                               | 2             |
| <b>Introduction</b>          |         |                                                                                                                                                                                                   |               |
| Background/rationale         | 2       | Explain the scientific background and rationale for the investigation being reported                                                                                                              | 4-5           |
| Objectives                   | 3       | State specific objectives, including any prespecified hypotheses                                                                                                                                  | 5             |
| <b>Methods</b>               |         |                                                                                                                                                                                                   |               |
| Study design                 | 4       | Present key elements of study design early in the paper                                                                                                                                           | 6             |
| Setting                      | 5       | Describe the setting, locations, and relevant dates, including periods of recruitment, exposure, follow-up, and data collection                                                                   | 6             |
| Participants                 | 6       | (a) Give the eligibility criteria, and the sources and methods of selection of participants                                                                                                       | 6             |
| Variables                    | 7       | Clearly define all outcomes, exposures, predictors, potential confounders, and effect modifiers. Give diagnostic criteria, if applicable                                                          | 6-7           |
| Data sources/<br>measurement | 8*      | For each variable of interest, give sources of data and details of methods of assessment (measurement). Describe comparability of assessment methods if there is more than one group              | 7             |
| Bias                         | 9       | Describe any efforts to address potential sources of bias                                                                                                                                         |               |
| Study size                   | 10      | Explain how the study size was arrived at                                                                                                                                                         | 6, Fig 1      |
| Quantitative variables       | 11      | Explain how quantitative variables were handled in the analyses. If applicable, describe which groupings were chosen and why                                                                      | 7             |
| Statistical methods          | 12      | (a) Describe all statistical methods, including those used to control for confounding                                                                                                             | 8             |
|                              |         | (b) Describe any methods used to examine subgroups and interactions                                                                                                                               |               |
|                              |         | (c) Explain how missing data were addressed                                                                                                                                                       | 6             |
|                              |         | (d) If applicable, describe analytical methods taking account of sampling strategy                                                                                                                | -             |
|                              |         | (e) Describe any sensitivity analyses                                                                                                                                                             | -             |
| <b>Results</b>               |         |                                                                                                                                                                                                   |               |
| Participants                 | 13*     | (a) Report numbers of individuals at each stage of study—eg numbers potentially eligible, examined for eligibility, confirmed eligible, included in the study, completing follow-up, and analysed | 9             |
|                              |         | (b) Give reasons for non-participation at each stage                                                                                                                                              | Fig 1         |
|                              |         | (c) Consider use of a flow diagram                                                                                                                                                                | Fig 1         |
| Descriptive data             | 14*     | (a) Give characteristics of study participants (eg demographic, clinical, social) and information on exposures and potential confounders                                                          | 9<br>tab 1    |
|                              |         | (b) Indicate number of participants with missing data for each variable of interest                                                                                                               | -             |
| Outcome data                 | 15*     | Report numbers of outcome events or summary measures                                                                                                                                              | 10<br>Table 2 |

1  
2  
3  
4  
5  
6  
7  
8  
9  
10  
11  
12  
13  
14  
15  
16  
17  
18  
19  
20  
21  
22  
23  
24  
25  
26  
27  
28  
29  
30  
31  
32  
33  
34  
35  
36  
37  
38  
39  
40  
41  
42  
43  
44  
45  
46  
47  
48  
49  
50  
51  
52  
53  
54  
55  
56  
57  
58  
59  
60

|                          |    |                                                                                                                                                                                                              |          |
|--------------------------|----|--------------------------------------------------------------------------------------------------------------------------------------------------------------------------------------------------------------|----------|
| Main results             | 16 | (a) Give unadjusted estimates and, if applicable, confounder-adjusted estimates and their precision (eg, 95% confidence interval). Make clear which confounders were adjusted for and why they were included | 11-12    |
|                          |    | (b) Report category boundaries when continuous variables were categorized                                                                                                                                    | 7, tab 1 |
|                          |    | (c) If relevant, consider translating estimates of relative risk into absolute risk for a meaningful time period                                                                                             | -        |
| Other analyses           | 17 | Report other analyses done—eg analyses of subgroups and interactions, and sensitivity analyses                                                                                                               | 11-12    |
| <b>Discussion</b>        |    |                                                                                                                                                                                                              |          |
| Key results              | 18 | Summarise key results with reference to study objectives                                                                                                                                                     | 14       |
| Limitations              | 19 | Discuss limitations of the study, taking into account sources of potential bias or imprecision. Discuss both direction and magnitude of any potential bias                                                   | 14-17    |
| Interpretation           | 20 | Give a cautious overall interpretation of results considering objectives, limitations, multiplicity of analyses, results from similar studies, and other relevant evidence                                   | 14-15    |
| Generalisability         | 21 | Discuss the generalisability (external validity) of the study results                                                                                                                                        | 17       |
| <b>Other information</b> |    |                                                                                                                                                                                                              |          |
| Funding                  | 22 | Give the source of funding and the role of the funders for the present study and, if applicable, for the original study on which the present article is based                                                |          |

\*Give information separately for exposed and unexposed groups.

**Note:** An Explanation and Elaboration article discusses each checklist item and gives methodological background and published examples of transparent reporting. The STROBE checklist is best used in conjunction with this article (freely available on the Web sites of PLoS Medicine at <http://www.plosmedicine.org/>, Annals of Internal Medicine at <http://www.annals.org/>, and Epidemiology at <http://www.epidem.com/>). Information on the STROBE Initiative is available at [www.strobe-statement.org](http://www.strobe-statement.org).

# BMJ Open

## Working in a cold environment, feeling cold at work and chronic pain: A cross-sectional analysis of The Tromsø Study

|                                 |                                                                                                                                                                                                                                                                                                                                                                                                                                                                                                                                                                                                                                                                                                                                                                                            |
|---------------------------------|--------------------------------------------------------------------------------------------------------------------------------------------------------------------------------------------------------------------------------------------------------------------------------------------------------------------------------------------------------------------------------------------------------------------------------------------------------------------------------------------------------------------------------------------------------------------------------------------------------------------------------------------------------------------------------------------------------------------------------------------------------------------------------------------|
| Journal:                        | <i>BMJ Open</i>                                                                                                                                                                                                                                                                                                                                                                                                                                                                                                                                                                                                                                                                                                                                                                            |
| Manuscript ID                   | bmjopen-2019-031248.R1                                                                                                                                                                                                                                                                                                                                                                                                                                                                                                                                                                                                                                                                                                                                                                     |
| Article Type:                   | Original research                                                                                                                                                                                                                                                                                                                                                                                                                                                                                                                                                                                                                                                                                                                                                                          |
| Date Submitted by the Author:   | 03-Oct-2019                                                                                                                                                                                                                                                                                                                                                                                                                                                                                                                                                                                                                                                                                                                                                                                |
| Complete List of Authors:       | Farbu, Erlend; UiT Norges arktiske universitet, Department of Community Medicine<br>Skandfer, Morten; UiT Norges arktiske universitet, Department of Community Medicine<br>Nielsen, Christopher ; Norwegian Institute of Public Health, Department of Chronic Diseases and Ageing; Oslo Universitetssykehus, Department of Pain Management and Research<br>Brenn, Tormod; UiT Norges arktiske universitet, Department of Community Medicine<br>Stubhaug, Audun; Oslo Universitetssykehus, Department of Pain Management and Research; University of Oslo Faculty of Medicine, Institute of Clinical Medicine<br>Höper, Anje; UiT Norges arktiske universitet, Department of Community Medicine; University Hospital of North Norway, Department of Occupational and Environmental Medicine |
| <b>Primary Subject Heading</b>: | Occupational and environmental medicine                                                                                                                                                                                                                                                                                                                                                                                                                                                                                                                                                                                                                                                                                                                                                    |
| Secondary Subject Heading:      | Epidemiology                                                                                                                                                                                                                                                                                                                                                                                                                                                                                                                                                                                                                                                                                                                                                                               |
| Keywords:                       | EPIDEMIOLOGY, OCCUPATIONAL & INDUSTRIAL MEDICINE, PUBLIC HEALTH                                                                                                                                                                                                                                                                                                                                                                                                                                                                                                                                                                                                                                                                                                                            |
|                                 |                                                                                                                                                                                                                                                                                                                                                                                                                                                                                                                                                                                                                                                                                                                                                                                            |

SCHOLARONE™  
Manuscripts

1  
2  
3 **Working in a cold environment, feeling cold at work and chronic pain: A cross-sectional analysis of**  
4 **The Tromsø Study**  
5

6 Corresponding author :

7 Erlend Hoftun Farbu

8 E-mail: [erlend.h.farbu@uit.no](mailto:erlend.h.farbu@uit.no)

9 Telephone: +47 95233350

10 Postal address: Erlend Hoftun Farbu

11 Institutt for samfunnsmedisin

12 Det helsevitenskapelige fakultet

13 UiT Norges arktiske universitet

14 9037 TROMSØ

15 NORWAY  
16  
17  
18  
19

20 Co-Authors

21 Morten Skandfer

22 Department of Community Medicine, UiT- The Arctic University of Norway, Tromsø, Norway

23 Christopher Sivert Nielsen

24 Department of Chronic Diseases and Ageing, Norwegian Institute of Public Health, Oslo,  
25 Norway

26 Department of Pain Management and Research, Oslo University Hospital, Oslo, Norway

27 Department of Community Medicine, UiT- The Arctic University of Norway, Tromsø, Norway

28 Tormod Brenn

29 Department of Community Medicine, UiT- The Arctic University of Norway, Tromsø, Norway

30 Audun Stubhaug

31 Department of Pain Management and Research, Oslo University Hospital, Oslo, Norway

32 Institute of Clinical Medicine, Faculty of Medicine, University of Oslo, Oslo, Norway

33 Anje Christina Höper

34 Department of Community Medicine, UiT- The Arctic University of Norway, Tromsø, Norway

35 Department of Occupational and Environmental Medicine, University Hospital of North  
36 Norway, Tromsø, Norway

37 Word count: 3320

38 Key words: Chronic pain, cold environment  
39  
40  
41  
42  
43  
44  
45  
46  
47  
48  
49  
50  
51  
52  
53  
54  
55  
56  
57  
58  
59  
60

## Abstract

**Aim:** The aim of this study was to investigate if working in a cold environment and feeling cold at work are associated with chronic pain (i.e. lasting  $\geq 3$  months).

**Methods:** We used data from the sixth survey (2007-2008) of the Tromsø Study. Analyses included 6533 men and women aged 30-67 years who were not retired, not receiving full-time disability benefits, and had no missing values. Associations between working in a cold environment, feeling cold at work, and self-reported chronic pain were examined with logistic regression adjusted for age, sex, education, body mass index, insomnia, physical activity at work, leisure time physical activity, and smoking.

**Results:** 779 participants reported working in a cold environment  $\geq 25\%$  of the time. This exposure was positively associated with pain at  $\geq 3$  sites (OR 1.57; 95% CI 1.23 to 2.01) and with neck, shoulder, and leg pain, but not with pain at 1-2 sites. Feeling cold sometimes or often at work was associated with pain at  $\geq 3$  sites (OR 1.58; 95% CI 1.22 to 2.07 and OR 3.90; 95% CI 2.04 to 7.45, respectively). Feeling cold often at work was significantly and positively associated with pain at all sites except the hand, foot, stomach, and head.

**Conclusion:** Working in a cold environment was significantly associated with chronic pain. The observed association was strongest for pain at musculoskeletal sites and for those who often felt cold at work.



## Article Summary

### Strengths and limitations of this study

- The study has a high response rate (65.7%) which increases the likelihood that it is a representative sample of the working population
- The observed associations in the present study are consistent for pain at multiple sites and at specific sites
- The healthy worker effect may cause an underestimation of the associations
- The results are to some extent vulnerable to residual confounding by other occupational risk factors

## INTRODUCTION

By evolution, humans are not physiologically fit to live in cold environments. To survive in such environments, we must use different strategies, such as insulating clothing, houses, and heating, which protect us from low temperatures. However, these protective measures may not be sufficient, as there is an excess of deaths recorded during the winter season. This excess is only partly explained by seasonal diseases and thus indicates that even moderately cold temperatures induce a strain on the body and negatively affect health.[1]

Cold exposure can cause pain. Indeed, immersing one's hand in cold water is commonly used as a test of pain tolerance.[2] Exposure to a cold environment, at work or during leisure time, can cause one to experience acute pain. In Finland, the reported prevalence of musculoskeletal pain believed by respondents to be caused by cold exposure is as high as 30% for men and 27% for women.[3, 4] Cold exposure is also known to reduce both physical and cognitive performance.[5, 6] Cold temperatures may also have sub-acute effects. Working in a cold environment has been found to be associated with an increased prevalence of back, neck, and shoulder pain.[7-10] In addition, it has been suggested that working in a cold environment is related to respiratory, cardiovascular, and dermatological complaints and diseases.[11]

Factors that affect workers' thermal balance are contact with water or cold surfaces, humidity, air velocity, radiation, type of clothing, and the heat produced by executing the work.[12] A cold working environment is defined as an environment with an ambient temperature below 10° C.[13] However, the ambient air temperature might not be a good measure of a worker's heat loss. In a study of seafood-processing workers, no relationship was found between workers' reports of feeling cold and measured air velocity, air temperature at the feet, or air temperature 1.1 meters above the floor.[14] This indicates that actual cold exposure is difficult to measure. Some studies have circumvented this problem by using self-reported cold experience as a measure of cold exposure.[15, 16] Among workers in the food processing industry, self-reported experiences of cooling of the neck, shoulder, wrist, and lower back were associated with a self-reported disadvantage in daily routines

1  
2  
3 due to pain at those sites.[15] In a study of seafood industry workers, feeling cold often at work was  
4  
5 associated with musculoskeletal pain.[16] Feeling cold often at work has also been associated with  
6  
7 an increased prevalence of symptoms from skin and airways.[14]  
8  
9

10 These previous studies mostly used 12-months prevalence, i.e. musculoskeletal pain over the last  
11  
12 12 months, as the outcome. This includes acute periods of pain within the past 12 months, but  
13  
14 contributes no information about the duration of pain. Chronic pain, defined as pain lasting 3 months  
15  
16 or longer, may be a better measure of the impact on quality of life and future work ability.[17, 18]  
17  
18 However, there is a lack of studies on the association between cold exposure and chronic  
19  
20 musculoskeletal pain or pain in other tissues. Therefore, the main aim of this study was to investigate  
21  
22 if working in a cold environment and feeling cold at work are associated with chronic pain. We  
23  
24 hypothesize that exposure to a cold work environment increases the prevalence of chronic pain.  
25  
26  
27  
28  
29  
30  
31  
32  
33  
34  
35  
36  
37  
38  
39  
40  
41  
42  
43  
44  
45  
46  
47  
48  
49  
50  
51  
52  
53  
54  
55  
56  
57  
58  
59  
60

## METHODS

### Participants

The Tromsø Study is a prospective cohort study performed in the municipality of Tromsø in Northern Norway. The study currently consists of seven surveys, with the first conducted in 1974 and the seventh in 2015-2016. Tromsø has a coastal climate; the outdoor temperature is below 10° C for a major part of the year and seldom falls below -10° C.[19] This study includes participants from the sixth survey of the Tromsø Study (Tromsø 6), which was carried out in 2007-2008 and encompassed physical examinations and extensive health questionnaires.[20] Of the 19,762 individuals invited to Tromsø 6, 12,984 (65.7%) participated. The age of the participants ranged from 30 to 87 years. We excluded participants who were retired, were above retirement age (i.e. 67 years), on full-time disability benefits, and those with missing values. Thus, the final study population comprised 6,533 men and women (Figure 1). The Regional Committee of Research Ethics approved Tromsø 6 and this particular analysis.

### Pain

Participants were asked “Do you have persistent or recurrent pain lasting 3 months or more” (Yes/No), and if so, at which anatomical site the pain was situated. The alternatives were jaw, neck, back, shoulder, arm (including elbow), hand, hip, leg (including thigh, knee, and calves), foot (including ankle), head (including face), chest, stomach, genitals, skin, and other. Sites where participants reported pain were then counted, and participants were categorized as having: no pain, pain at 1-2 sites, and pain at ≥3 sites.

### Cold exposure

The Tromsø 6 questionnaire included the question “Do you work outdoors at least 25% of the time or in cold buildings (e.g. storage/industry buildings)?”. Only those who answered “Yes” were given an extra set of questions about working in a cold environment in the second questionnaire. Among those questions were “Do you feel cold at work?” (yes, often/yes, sometimes/no, never).

### Confounders

1  
2  
3 Possible confounders obtained from the questionnaires were age, sex, education, insomnia, physical  
4 activity at work, leisure time physical activity, and smoking. Body mass index (BMI) was calculated  
5 from weight and height measured at the examination. BMI was categorized into underweight/normal  
6 weight ( $<25 \text{ kg/m}^2$ ), overweight ( $\geq 25 \text{ kg/m}^2$  and  $<30 \text{ kg/m}^2$ ) and obese ( $\geq 30 \text{ kg/m}^2$ ) in the descriptive  
7 statistics, but it was included as a continuous variable in the regression analysis. Insomnia was  
8 assessed by the question "In the past 12 months, how often have you suffered from sleeplessness?"  
9 (never, or just a few times a year/1-3 times a month/approximately once a week/more than once a  
10 week). Physical activity at work was measured with the question "If you have paid or unpaid work,  
11 which statement describes your work best?" (mostly sedentary/requires a lot of walking/requires a  
12 lot of walking and lifting/heavy manual labor). Leisure time physical activity had four categories:  
13 sedentary, low, moderate, and hard. Sedentary was described as "reading, watching TV, or other  
14 sedentary activity", low as "walking, cycling, or other forms of exercise at least 4 hours per week",  
15 moderate as "recreational sports, heavy gardening for at least 4 hours per week", and hard as "hard  
16 training or sports competition, regularly several times per week". Smoking was categorized into  
17 current, former, and never smoker.  
18  
19  
20  
21  
22  
23  
24  
25  
26  
27  
28  
29  
30  
31  
32  
33  
34  
35  
36  
37  
38

### 39 **Statistics**

40  
41 Pearson chi-square was used to test differences in prevalence if all cells had  $n > 5$ ; Fisher's exact test  
42 was used if  $n \leq 5$ . T-test was used for age. Multivariable logistic regression was used to assess the  
43 association between working in a cold environment  $\geq 25\%$  of the time and self-reported pain. All  
44 statistical analyses were performed in Stata MP 15.  
45  
46  
47  
48  
49

### 50 **Patient and Public Involvement**

51  
52 There were no patient or public involvement in this particular sub-study.  
53  
54  
55  
56  
57  
58  
59  
60

## RESULTS

### Participants

Among the 6,533 participants included in the study, 779 reported to work in a cold environment  $\geq 25\%$  of the time. These individuals were younger, were mostly men, had lower levels of education compared to the rest of the working population, and had a higher BMI. They were also more likely to have physically demanding work, have lower levels of leisure time physical activity and to be current or former smokers (Table 1).

Table 1 Characteristics of the study population

|                                                        | Working in a cold environment $\geq 25\%$ of the time |      |            |      | t/ $\chi^2$ |
|--------------------------------------------------------|-------------------------------------------------------|------|------------|------|-------------|
|                                                        | No, n=5754                                            |      | Yes, n=779 |      |             |
|                                                        | n                                                     | %    | n          | %    | p-value     |
| <b>Age (years)*</b>                                    | 49.9                                                  | 8.8  | 48.8       | 8.7  | <0.001      |
| <b>Sex</b>                                             |                                                       |      |            |      |             |
| Female                                                 | 3178                                                  | 55.2 | 143        | 18.4 |             |
| Male                                                   | 2576                                                  | 44.8 | 636        | 81.6 | <0.001      |
| <b>Education</b>                                       |                                                       |      |            |      |             |
| Primary/secondary                                      | 727                                                   | 12.6 | 262        | 33.6 |             |
| Technical school                                       | 1261                                                  | 21.9 | 308        | 39.5 |             |
| High school                                            | 513                                                   | 8.9  | 75         | 9.6  |             |
| College/university <4 years                            | 1350                                                  | 23.5 | 94         | 12.1 |             |
| College/university $\geq 4$ years                      | 1903                                                  | 33.1 | 40         | 5.1  | <0.001      |
| <b>Body mass index</b>                                 |                                                       |      |            |      |             |
| Under and normal weight (<25 kg/m <sup>2</sup> )       | 2233                                                  | 38.8 | 205        | 26.3 |             |
| Overweight ( $\geq 25$ and <30 kg/m <sup>2</sup> )     | 2494                                                  | 43.3 | 406        | 52.1 |             |
| Obese ( $\geq 30$ kg/m <sup>2</sup> )                  | 1027                                                  | 17.8 | 168        | 21.6 | <0.001      |
| <b>Insomnia</b>                                        |                                                       |      |            |      |             |
| Never, or just a few times a year                      | 3927                                                  | 68.2 | 576        | 73.9 |             |
| 1-3 times a month                                      | 1042                                                  | 18.1 | 118        | 15.1 |             |
| Approximately once a week                              | 365                                                   | 6.3  | 42         | 5.4  |             |
| More than once a week                                  | 420                                                   | 7.3  | 43         | 5.5  | 0.014       |
| <b>Physical activity at work</b>                       |                                                       |      |            |      |             |
| Mostly sedentary work                                  | 3497                                                  | 60.8 | 87         | 11.2 |             |
| Work that requires a lot of walking                    | 1454                                                  | 25.3 | 176        | 22.6 |             |
| Work that requires a lot of walking and lifting (n, %) | 760                                                   | 13.2 | 379        | 48.7 |             |
| Heavy manual labor                                     | 43                                                    | 0.7  | 137        | 17.6 | <0.001      |
| <b>Leisure time physical activity</b>                  |                                                       |      |            |      |             |
| Sedentary                                              | 1081                                                  | 18.8 | 186        | 23.9 |             |
| Low                                                    | 3350                                                  | 58.2 | 410        | 52.6 |             |
| Moderate                                               | 1176                                                  | 20.4 | 174        | 22.3 |             |

Hard 147 2.6 9 1.2 <0.001

**Smoking**

|         |      |      |     |      |        |
|---------|------|------|-----|------|--------|
| Current | 1111 | 19.3 | 211 | 27.1 |        |
| Former  | 2227 | 38.7 | 319 | 40.9 |        |
| Never   | 2416 | 42   | 249 | 32   | <0.001 |

\*Numbers are mean and standard deviation for age, otherwise n and %.

Out of the 779 workers who reported working in a cold environment  $\geq 25\%$  of the time, 92 never felt cold at work, 635 felt cold sometimes, and 52 felt cold often. The prevalence of chronic pain at different anatomical sites was higher in those who often or sometimes felt cold at work compared to those who never felt cold (Table 2).

Table 2 Prevalence of chronic pain in participants working in a cold environment <25% of the time and in those working in a cold environment  $\geq 25\%$  of the time by frequency of feeling cold

| Anatomical sites                 | Working in a cold environment <25% of the time<br>n=5754 |    | Frequency of feeling cold at work among those working in a cold environment $\geq 25\%$ of the time<br>n=779. |    |                  |    |             |    |
|----------------------------------|----------------------------------------------------------|----|---------------------------------------------------------------------------------------------------------------|----|------------------|----|-------------|----|
|                                  | n                                                        | %  | Never, n=92                                                                                                   |    | Sometimes, n=635 |    | Often, n=52 |    |
|                                  | n                                                        | %  | n                                                                                                             | %  | n                | %  | n           | %  |
| <b>1-2 sites</b>                 | 783                                                      | 14 | 14                                                                                                            | 15 | 91               | 14 | 8           | 15 |
| <b><math>\geq 3</math> sites</b> | 904                                                      | 16 | 7                                                                                                             | 8  | 128              | 20 | 21          | 40 |
| <b>Neck</b>                      | 765                                                      | 13 | 8                                                                                                             | 9  | 106              | 17 | 18          | 35 |
| <b>Back</b>                      | 811                                                      | 14 | 6                                                                                                             | 7  | 106              | 17 | 14          | 27 |
| <b>Shoulder</b>                  | 753                                                      | 13 | 8                                                                                                             | 9  | 113              | 18 | 18          | 35 |
| <b>Arm</b>                       | 465                                                      | 8  | 6                                                                                                             | 7  | 69               | 11 | 11          | 21 |
| <b>Hand</b>                      | 341                                                      | 6  | 3                                                                                                             | 3  | 39               | 6  | 6           | 12 |
| <b>Hip</b>                       | 514                                                      | 9  | 7                                                                                                             | 8  | 49               | 8  | 9           | 17 |
| <b>Leg</b>                       | 557                                                      | 10 | 7                                                                                                             | 8  | 76               | 12 | 13          | 25 |
| <b>Foot</b>                      | 385                                                      | 7  | 3                                                                                                             | 3  | 36               | 6  | 4           | 8  |
| <b>Head</b>                      | 318                                                      | 6  | 0                                                                                                             | 0  | 32               | 5  | 7           | 14 |
| <b>Stomach</b>                   | 210                                                      | 4  | 1                                                                                                             | 1  | 27               | 4  | 5           | 10 |

## Multiple pain sites

Working in a cold environment  $\geq 25\%$  of the time was significantly associated with pain at  $\geq 3$  sites after adjustment (odds ratio [OR] 1.57; 95% confidence interval [CI] 1.23 to 2.01) (Table 3).

Table 3 Logistic regression analysis with pain at 1-2 or  $\geq 3$  sites and specific pain sites as outcomes

| Anatomical sites                   | Working in a cold environment <25% of the time<br>n = 5754 | Working in a cold environment $\geq 25\%$ of the time<br>n = 779 |                          |             |             |                       |             |             |
|------------------------------------|------------------------------------------------------------|------------------------------------------------------------------|--------------------------|-------------|-------------|-----------------------|-------------|-------------|
|                                    | Reference<br>n                                             | n                                                                | Adjusted for age and sex |             |             | Fully adjusted model* |             |             |
|                                    |                                                            |                                                                  | OR                       | 95% CI      |             | OR                    | 95% CI      |             |
| <b>1-2 sites †</b>                 | 783                                                        | 113                                                              | <b>1.15</b>              | <b>0.92</b> | <b>1.44</b> | 0.95                  | 0.73        | 1.24        |
| <b><math>\geq 3</math> sites ‡</b> | 904                                                        | 156                                                              | <b>2.02</b>              | <b>1.64</b> | <b>2.48</b> | <b>1.57</b>           | <b>1.23</b> | <b>2.01</b> |
| <b>Neck</b>                        | 765                                                        | 132                                                              | <b>1.78</b>              | <b>1.44</b> | <b>2.20</b> | <b>1.46</b>           | <b>1.13</b> | <b>1.89</b> |
| <b>Back</b>                        | 811                                                        | 126                                                              | <b>1.38</b>              | <b>1.12</b> | <b>1.71</b> | 1.18                  | 0.91        | 1.52        |
| <b>Shoulder</b>                    | 753                                                        | 139                                                              | <b>1.96</b>              | <b>1.58</b> | <b>2.42</b> | <b>1.39</b>           | <b>1.08</b> | <b>1.78</b> |
| <b>Arm</b>                         | 465                                                        | 86                                                               | <b>1.93</b>              | <b>1.49</b> | <b>2.50</b> | 1.34                  | 0.98        | 1.83        |
| <b>Hand</b>                        | 341                                                        | 48                                                               | <b>1.66</b>              | <b>1.19</b> | <b>2.32</b> | 1.16                  | 0.79        | 1.71        |
| <b>Hip</b>                         | 514                                                        | 65                                                               | <b>1.59</b>              | <b>1.19</b> | <b>2.12</b> | 1.26                  | 0.90        | 1.75        |
| <b>Leg</b>                         | 557                                                        | 96                                                               | <b>1.87</b>              | <b>1.47</b> | <b>2.40</b> | <b>1.47</b>           | <b>1.10</b> | <b>1.96</b> |
| <b>Foot</b>                        | 385                                                        | 43                                                               | 1.16                     | 0.83        | 1.63        | 0.80                  | 0.54        | 1.19        |
| <b>Head</b>                        | 318                                                        | 39                                                               | 1.28                     | 0.89        | 39          | 1.13                  | 0.75        | 1.70        |
| <b>Stomach</b>                     | 210                                                        | 33                                                               | 1.42                     | 0.96        | 33          | 1.30                  | 0.82        | 2.04        |

\* Adjusted for age, sex, education, body mass index, insomnia, physical activity at work, leisure time physical activity, and smoking

† Model does not include those with pain at  $\geq 3$  sites

‡ Model does not include those with pain at 1-2 sites

OR: odds ratio, CI: confidence interval.

However, in the fully-adjusted model, those who worked in a cold environment  $\geq 25\%$  of the time did not have higher odds for pain at 1-2 sites compared to those who worked in a cold environment <25% of the time. When those who worked in a cold environment  $\geq 25\%$  were divided by frequency



1  
2  
3 of feeling cold, feeling cold sometimes and often was associated with pain at  $\geq 3$  sites (OR 1.58; 95%  
4 CI 1.22 to 2.07 and OR 3.90; 95% CI 2.04 to 7.45, respectively) (Figure 2).

### 7 **Pain at specific sites**

9  
10 In the analysis with pain at specific sites as outcomes, the low number of participants who worked in  
11 a cold environment  $\geq 25\%$  with pain in the jaw (n=4), chest (n=10), skin (n=5), genitals (n=8), and  
12 other location (n=3) prevented separate analyses for these outcomes. When using pain at the  
13 remaining 10 sites as separate outcomes, working in cold environments  $\geq 25\%$  of the time was  
14 significantly associated with pain at all sites except the foot, head, and stomach in the model  
15 adjusted for age and sex (Table 3). Although those working in cold environments  $\geq 25\%$  of the time  
16 had higher odds for pain at all sites except the foot in the fully-adjusted model, only the associations  
17 for pain at the neck, shoulder, and leg were statistically significant (Table 3).

18  
19 When those working in cold environments  $\geq 25\%$  of the time were divided by frequency of feeling  
20 cold, those who felt cold sometimes or often at work had significantly higher odds for pain at most  
21 musculoskeletal sites compared to those working in a cold environment  $< 25\%$  of the time. In the  
22 model adjusted for age and sex, feeling cold often was significantly associated with head and  
23 stomach pain (Figure 2).

24  
25 After adjusting for possible confounders, only pain from musculoskeletal pain sites remained  
26 significant; workers who felt cold often had higher odds for neck, shoulder, arm, leg, back, and hip  
27 pain compared to the group that worked in a cold environment  $< 25\%$  of the time (Figure 2). The  
28 strongest association was for neck pain (OR 3.05; 95% CI 1.64-5.66). Among those working in cold  
29 environments  $\geq 25\%$  of the time, the group that reported feeling cold sometimes at work had higher  
30 odds for neck, shoulder, and leg pain, with ORs between those who never felt cold and those who  
31 felt cold often at work (Figure 2). In the group working in cold environments  $\geq 25\%$  of the time, never  
32 feeling cold at work was not significantly associated with chronic pain at any specific site in either of  
33 the models.

## DISCUSSION

### Key results

In this study, working in a cold environment  $\geq 25\%$  of the time was associated with chronic pain (i.e. pain lasting  $\geq 3$  months) at the neck, shoulder, and leg, as well as pain at  $\geq 3$  sites, even after adjusting for age, sex, education, BMI, insomnia, physical activity at work, and leisure time physical activity. Those who felt cold often at work had significantly higher odds for pain at  $\geq 3$  sites and for pain at all specified sites except the hand, foot, head, and stomach. Feeling cold sometimes at work was significantly associated with neck, shoulder, and leg pain. We found no significant differences in chronic pain between those who never felt cold when working in a cold environment  $\geq 25\%$  of the time and those who work in cold environment  $< 25\%$  of the time.

There are many different etiologies of pain and we do not have sufficient information to appropriately identify the origin of the pain.[21] Additionally, we have no information on whether the reported pain was present at all times or only when exposed to cold environment. Nevertheless, the ORs for chronic pain at musculoskeletal locations in the present study were lower than estimates for musculoskeletal pain during the last 12 months from studies of slaughterhouse and seafood industry workers.[15, 16] Interestingly, in the fully-adjusted model, we found no association between working in a cold environment  $\geq 25\%$  of the time and hand and foot pain. These are the body parts that are most susceptible to cooling. If cooling of local tissue is the mechanism for a higher prevalence of chronic pain, one could assume that body parts most exposed to cold would be at a higher risk for pain. The results for hand and foot in the present study do not support such an assumption. However, this observation is in contrast to other studies that found associations between a cold environment or an experience of cooling of the wrist and pain in the wrist, hand, and forearm.[7, 15, 22] The difference between earlier findings and the present study might be due to a different etiology and pathology for chronic musculoskeletal pain and 12-month pain prevalence. Different study populations and cold exposures could also contribute to the contradictory results.

1  
2  
3       Feeling cold is a subjective experience and contains little or no information about the actual  
4  
5 environment, such as ambient temperature, humidity, and air velocity. However, ambient  
6  
7 temperature could also be a poor measure of cold exposure. A study of seafood industry workers  
8  
9 could not establish a simple relationship between thermal environmental factors and the prevalence  
10  
11 of workers feeling cold. The same study also found that working in relatively high temperatures (>12°  
12  
13 C) led to low finger temperatures and a major drop in foot temperature.[14] Thermal comfort and  
14  
15 sensation seem to be closely connected to both average skin temperature and rectal  
16  
17 temperature.[23] Although subjective, feeling cold might be a better indication of the environment's  
18  
19 effect on the body than ambient air temperature.  
20  
21  
22

23       The general health status of a person might also influence to what degree they feel cold.  
24  
25 Individuals with already existing diseases are more prone to report cold-related musculoskeletal pain  
26  
27 [24], and male slaughterhouse workers with chronic pain had more complaints about indoor climate,  
28  
29 including complaints about temperatures that were too low and draughts, when compared to those  
30  
31 without pain.[25] Chronic pain could also influence the perception of feeling cold. The design of the  
32  
33 present study is not adequate to address the direction of the observed association.  
34  
35  
36

37       Few plausible causal mechanisms between cold exposure and musculoskeletal pain, chronic or  
38  
39 not, have been suggested. Studies have found that cooling induces acute physiological alterations in  
40  
41 the musculoskeletal and neural system. There seems to be a dose-response relationship between the  
42  
43 temperature in the muscle and muscle power, and the contraction velocity decreases with  
44  
45 decreasing temperature. Further, there is an increased activation of the antagonist muscles  
46  
47 indicating a reduced motor control. [26-28] Another study reports an enhanced fatigue in the  
48  
49 muscles when performing repetitive work in a cold environment.[29] These alterations point in the  
50  
51 direction that cold exposure increases the strain on the musculoskeletal apparatus. Repeated  
52  
53 exposure to a cold environment can also have a long-term effect in the form of habituation or  
54  
55 acclimatization. Habituation is described as a reduction in shivering, vasoconstriction stress response  
56  
57 and cold sensation. Additionally, different acclimatization processes like lowering core temperature,  
58  
59  
60

1  
2  
3 increasing the metabolic rate and increasing vasoconstriction or sub-cutaneous fat have been  
4 reported.[30] However, a relationship between these altered acute and long-term physiological  
5 responses, and subsequent chronic pain has not been satisfactorily established. A cross-sectional  
6 study of slaughterhouse workers found that a lower pressure pain threshold was associated with  
7 more complaints about the indoor climate.[25] A possible explanation for the observed association  
8 between chronic pain and frequency of feeling cold in the present study could be that persons who  
9 felt cold have a lower pain threshold than those who did not. Future research should explore  
10 whether this is genetic, or if thermal stimuli could contribute to a sensitization process.

### 21 **Strengths and limitations**

22  
23 In our study, participants who worked in a cold environment  $\geq 25$  of the time had generally low  
24 education and executed a lot of heavy physical work, both of which have been identified as risk  
25 factors for musculoskeletal pain; [31-33] adjusting for these confounders attenuated the associations  
26 in the present study. Workers exposed to cold are also exposed to several other occupational risk  
27 factors that can be associated with poor health, and physical activity at work is not a satisfactory  
28 measure of these risk factors.[34] Consequently, the results are to some extent vulnerable to residual  
29 confounding.

30  
31  
32  
33  
34  
35  
36  
37  
38  
39 There are a number of clinical conditions that could be a cause of pain, or increase the risk of  
40 chronic pain.[21] As these conditions could be unevenly distributed, they could confound the  
41 observed association. Our results could also be influenced by the healthy-worker effect.[35] Feeling  
42 cold is uncomfortable, and individuals negatively affected by a cold environment might change their  
43 occupation or workplace to avoid getting cold. The remaining employees exposed to cold may  
44 therefore be the ones that are the least negatively affected by the cold. Additionally, chronic pain  
45 can contribute to selection bias by having a different impact in different occupations. There is a social  
46 gradient in disability benefits, and physical work has been found to increase the risk for disability  
47 pension, even after adjustment for health status.[36] Thus, the effect estimates may be  
48 underestimated.

1  
2  
3 The high response rate (65.7 %) of Tromsø 6 is a major strength and increases the likelihood that  
4 the findings are representative of the general population. Nevertheless, non-participants in Tromsø 6  
5 tend to have lower education than participants;<sup>[20]</sup> therefore we cannot rule out that the  
6 prevalence of cold-exposed workers was higher among non-participants. Additionally, some of the  
7 occupations in which workers are typically exposed to cold environments have a high number of  
8 migrant workers, a group not invited to participate in The Tromsø Study. As an example, in 2008 in  
9 Norway, approximately 12% of workers in the construction industry were migrant workers.<sup>[37]</sup> These  
10 aspects may have led to selection bias and thus an underestimation of the proportion of workers  
11 exposed to a cold environment. How this selection bias affects the association between feeling cold  
12 and musculoskeletal pain or cold-related health complaints is not known.

13  
14 A clear limitation of the study is the low number of participants who reported feeling cold often  
15 or never, resulting in large CIs. Also, there were few female participants working in a cold  
16 environment  $\geq 25\%$  of the time ( $n=123$ ), which prevented any useful analysis stratified by sex. There  
17 are sex differences in types of work, prevalence of cold discomfort or cooling <sup>[15]</sup>, and in the  
18 prevalence of musculoskeletal pain.<sup>[33]</sup> The association between working in cold environment and  
19 musculoskeletal pain is likely different by sex.

20  
21 The observed associations in the present study are consistent for pain at multiple sites and at  
22 specific sites. Although not all the effect estimates were significant, the direction of the associations  
23 was consistent, with increased pain reporting with increasing experience of cold at work, at all sites  
24 except the hip. This consistency and the high effect estimates indicate that the observed associations  
25 are robust, and that additional adjustment for occupational risk factors would not explain all  
26 associations.

27  
28 Even though Tromsø is situated at 69°N, the climate is relatively mild due to the Gulf Stream.  
29 There are also several factors other than ambient air temperature that can affect a worker's thermal  
30 balance, e.g. amount of protective clothing. At work, individual differences in heat loss, and  
31 protection and adaptations such as behavioral responses, adjusting clothing, or increasing physical  
32

1  
2  
3 activity, are very difficult to measure and would vary throughout a workday. The heat loss of one  
4  
5 worker in a cold environment may be the same as that of another in a moderately cold environment  
6  
7 if not properly protected. Thus, we believe the results of the present study are not specific to our  
8  
9 study population, but relevant to others working in cold environments, whether they are indoors or  
10  
11 outdoors.  
12  
13  
14  
15  
16  
17  
18

## 19 Conclusion

20  
21 Working in a cold environment  $\geq 25\%$  of the time was associated with chronic pain at  $\geq 3$  sites, and  
22  
23 with neck, shoulder, and leg pain. Those who worked in a cold environment and felt cold often at  
24  
25 work had higher odds for neck, shoulder, arm, back, hip, and leg pain compared to those who  
26  
27 worked in a cold environment  $< 25\%$  of the time. Working in a cold environment  $\geq 25\%$  of the time  
28  
29 and never feeling cold was not associated with pain at any site. Organizing work and workplaces in a  
30  
31 way that ensures thermal balance for workers might reduce the risk of chronic pain.  
32  
33  
34  
35  
36  
37  
38  
39  
40  
41  
42

43 1 Gasparrini A, Guo Y, Hashizume M, et al. Mortality risk attributable to high and low ambient  
44 temperature: a multicountry observational study. *Lancet*. 2015;386(9991):369-75  
45 doi:10.1016/s0140-6736(14)62114-0.

46 2 Modir JG, Wallace MS. Human experimental pain models 2: the cold pressor model. *Methods in*  
47 *molecular biology (Clifton, NJ)*. 2010;617:165-8 doi:10.1007/978-1-60327-323-7\_13.

48 3 Pienimäki T, Karppinen J, Rintamäki H, et al. Prevalence of cold-related musculoskeletal pain  
49 according to self-reported threshold temperature among the Finnish adult population. *Eur J Pain*.  
50 2014;18(2):288-98 doi:10.1002/j.1532-2149.2013.00368.x.

51 4 Raatikka VP, Rytönen M, Nayha S, et al. Prevalence of cold-related complaints, symptoms and  
52 injuries in the general population: the FINRISK 2002 cold substudy. *Int J Biometeorol*. 2007;51(5):441-  
53 8 doi:10.1007/s00484-006-0076-1.

54 5 Makinen TM, Palinkas LA, Reeves DL, et al. Effect of repeated exposures to cold on cognitive  
55 performance in humans. *Physiology & behavior*. 2006;87(1):166-76  
56 doi:10.1016/j.physbeh.2005.09.015.

57 6 Pilcher JJ, Nadler E, Busch C. Effects of hot and cold temperature exposure on performance: a  
58 meta-analytic review. *Ergonomics*. 2002;45(10):682-98 doi:10.1080/00140130210158419.  
59  
60

- 1  
2  
3 7 Pienimaki T. Cold exposure and musculoskeletal disorders and diseases. A review. *Int J Circumpolar Health*. 2002;61(2):173-82
- 4  
5 8 Burstrom L, Jarvholm B, Nilsson T, et al. Back and neck pain due to working in a cold environment: a  
6 cross-sectional study of male construction workers. *Int Arch Occup Environ Health*. 2012  
7 doi:10.1007/s00420-012-0818-9.
- 8  
9 9 Dovrat E, Katz-Leurer M. Cold exposure and low back pain in store workers in Israel. *Am J Ind Med*.  
10 2007;50(8):626-31 doi:10.1002/ajim.20488.
- 11  
12 10 Skandfer M, Talykova L, Brenn T, et al. Low back pain among mineworkers in relation to driving,  
13 cold environment and ergonomics. *Ergonomics*. 2014;57(10):1541-8  
14 doi:<http://dx.doi.org/10.1080/00140139.2014.904005>.
- 15  
16 11 Makinen TM, Hassi J. Health problems in cold work. *Ind Health*. 2009;47(3):207-20  
17 doi:JST.JSTAGE/indhealth/47.207 [pii].
- 18  
19 12 Parsons K. Human Thermal Environments: The Effects of Hot, Moderate, and Cold Environments  
20 on Human Health, Comfort, and Performance: CRC Press, Inc.; 2014. 635 p.
- 21  
22 13 International Organization of Standardisation ISO 15743:2008 Ergonomics of the thermal  
23 environment - Cold workplaces- Risk assessment and management. Geneva2008.
- 24  
25 14 Bang BE, Aasmoe L, Aardal L, et al. Feeling cold at work increases the risk of symptoms from  
26 muscles, skin, and airways in seafood industry workers. *Am J Ind Med*. 2005;47(1):65-71  
27 doi:10.1002/ajim.20109.
- 28  
29 15 Sormunen E, Remes J, Hassi J, et al. Factors associated with self-estimated work ability and  
30 musculoskeletal symptoms among male and female workers in cooled food-processing facilities. *Ind*  
31 *Health*. 2009;47(3):271-82
- 32  
33 16 Aasmoe L, Bang B, Egeness C, et al. Musculoskeletal symptoms among seafood production  
34 workers in North Norway. *Occup Med (Lond)*. 2008;58(1):64-70
- 35  
36 17 Skevington SM. Investigating the relationship between pain and discomfort and quality of life,  
37 using the WHOQOL. *Pain*. 1998;76(3):395-406 doi:[https://doi.org/10.1016/S0304-3959\(98\)00072-4](https://doi.org/10.1016/S0304-3959(98)00072-4).
- 38  
39 18 Mallen CD, Peat G, Thomas E, et al. Prognostic factors for musculoskeletal pain in primary care: a  
40 systematic review. *The British journal of general practice : the journal of the Royal College of General*  
41 *Practitioners*. 2007;57(541):655-61
- 42  
43 19 Weather statistics for Tromsø observation site, Tromsø (Troms) yr.no: The Norwegian  
44 Meteorological Institute; 2018 [cited 2018 13.11]. Available from:  
45 [https://www.yr.no/place/Norway/Troms/Troms%C3%B8/Troms%C3%B8\\_observation\\_site/statistics.html](https://www.yr.no/place/Norway/Troms/Troms%C3%B8/Troms%C3%B8_observation_site/statistics.html).
- 46  
47 20 Eggen AE, Mathiesen EB, Wilsgaard T, et al. The sixth survey of the Tromso Study (Tromso 6) in  
48 2007-08: collaborative research in the interface between clinical medicine and epidemiology: study  
49 objectives, design, data collection procedures, and attendance in a multipurpose population-based  
50 health survey. *Scandinavian journal of public health*. 2013;41(1):65-80  
51 doi:10.1177/1403494812469851.
- 52  
53 21 Treede RD, Rief W, Barke A, et al. A classification of chronic pain for ICD-11. *Pain*.  
54 2015;156(6):1003-7 doi:10.1097/j.pain.000000000000160.
- 55  
56 22 Kurppa K, Viikari-Juntura E, Kuosma E, et al. Incidence of tenosynovitis or peritendinitis and  
57 epicondylitis in a meat-processing factory. *Scand J Work Environ Health*. 1991;17(1):32-7
- 58  
59 23 Gagge AP, Stolwijk JAJ, Hardy JD. Comfort and thermal sensations and associated physiological  
60 responses at various ambient temperatures. *Environmental research*. 1967;1(1):1-20  
doi:10.1016/0013-9351(67)90002-3.
- 24  
25 24 Nayha S, Hassi J, Jousilahti P, et al. Cold-related symptoms among the healthy and sick of the  
general population: National FINRISK Study data, 2002. *Public Health*. 2011;125(6):380-8  
doi:10.1016/j.puhe.2011.02.014.
- 26  
27 25 Sundstrup E, Jakobsen MD, Brandt M, et al. Central Sensitization and Perceived Indoor Climate  
among Workers with Chronic Upper-Limb Pain: Cross-Sectional Study. *Pain research and treatment*.  
2015;2015:793750 doi:10.1155/2015/793750.



- 1  
2  
3 26 Oksa J, Sormunen E, Koivukangas U, et al. Changes in neuromuscular function due to  
4 intermittently increased workload during repetitive work in cold conditions. *Scand J Work Environ*  
5 *Health*. 2006;32(4):300-9  
6  
7 27 Sormunen E, Rissanen S, Oksa J, et al. Muscular activity and thermal responses in men and women  
8 during repetitive work in cold environments. *Ergonomics*. 2009;52(8):964-76  
9 doi:10.1080/00140130902767413.  
10  
11 28 Racinais S, Oksa J. Temperature and neuromuscular function. *Scandinavian journal of medicine &*  
12 *science in sports*. 2010;20 Suppl 3:1-18 doi:10.1111/j.1600-0838.2010.01204.x.  
13  
14 29 Oksa J, Ducharme MB, Rintamaki H. Combined effect of repetitive work and cold on muscle  
15 function and fatigue. *J Appl Physiol*. 2002;92(1):354-61  
16  
17 30 Makinen TM. Nordic Society for Arctic Medicine. The effects of cold adaptation on human  
18 performance. *Int J Circumpolar Health*. 2003;62(4):445  
19  
20 31 Lötters F, Burdorf A, Kuiper J, et al. Model for the work-relatedness of low-back pain.  
21 *Scandinavian Journal of Work, Environment and Health*. 2003;29(6):431-40 doi:10.5271/sjweh.749.  
22  
23 32 Hoozemans MJ, Knelange EB, Frings-Dresen MH, et al. Are pushing and pulling work-related risk  
24 factors for upper extremity symptoms? A systematic review of observational studies. *Occup Environ*  
25 *Med*. 2014;71(11):788-95 doi:10.1136/oemed-2013-101837.  
26  
27 33 Andorsen OF, Ahmed LA, Emaus N, et al. A prospective cohort study on risk factors of  
28 musculoskeletal complaints (pain and/or stiffness) in a general population. The Tromso study. *PloS*  
29 *one*. 2017;12(7):e0181417 doi:10.1371/journal.pone.0181417.  
30  
31 34 Niedhammer I, Chastang J-F, David S, et al. The contribution of occupational factors to social  
32 inequalities in health: Findings from the national French SUMER survey. *Social Science & Medicine*.  
33 2008;67(11):1870-81 doi:<https://doi.org/10.1016/j.socscimed.2008.09.007>.  
34  
35 35 Li CY, Sung FC. A review of the healthy worker effect in occupational epidemiology. *Occup Med*  
36 *(Lond)*. 1999;49(4):225-9  
37  
38 36 Krokstad S, Johnsen R, Westin S. Social determinants of disability pension: a 10-year follow-up of  
39 62 000 people in a Norwegian county population. *Int J Epidemiol*. 2002;31(6):1183-91  
40  
41 37 Andersen RK, Jordfald B. Arbeidstakere i byggenæringen i 2008 og 2014. Fafo; 2016. Report No.:  
42 39.  
43  
44  
45  
46  
47  
48  
49  
50  
51  
52  
53  
54  
55  
56  
57  
58  
59  
60



## FIGURE LEGENDS

Figure 1 Flow chart presenting number of subjects invited to Tromsø 6, those who participated in Tromsø 6, and those excluded and included in the present analysis.

Figure 2 Odds ratios with 95% confidence intervals for chronic pain. Working in a cold environment  $\geq 25\%$  of the time and feeling cold never, sometimes, or often compared to those working in a cold environment  $< 25\%$  of the time

## Acknowledgments

### Contributors

EHF, ACH and MS designed the study. EHF conducted the data analysis and wrote the manuscript with the assistance of ACH and MS. TB assisted in the analysis. All authors contributed to the interpretation and revised the manuscript. CSN and AS contributed to the data acquisition of questions regarding pain from the 6th survey of the Tromsø study. All authors read and approved the final manuscript.

### Collaborators

Lisbeth Aasmoe contributed to the data acquisition of questions regarding work in the cold from the 6<sup>th</sup> survey of the Tromsø study.

### Funding

This particular study has been funded by UiT- The Arctic University of Norway. The sixth survey of The Tromsø Study is a collaboration between the Northern Norway Regional Health Authority, UiT- The Arctic University of Norway, Norwegian Ministry of Health and Care Services, Troms County and the Norwegian Institute of Public Health.

The publication charges for this article have been funded by a grant from the publication fund of UiT The Arctic University of Norway

**Competing interests:** None declared

**Data sharing:** All data are available by applying to The Tromsø Study

<http://tromsundersokelsen.uit.no/tromso/>



Pain at ≥ 3 sites

1-2 pain sites

Neck

Back

1  
2  
3  
4  
5  
6  
7  
8  
9  
10  
11  
12  
13  
14  
15  
16  
17  
18  
19  
20  
21  
22  
23  
24  
25  
26  
27

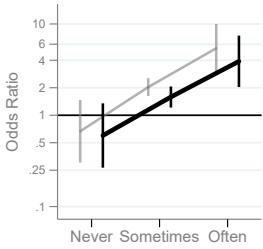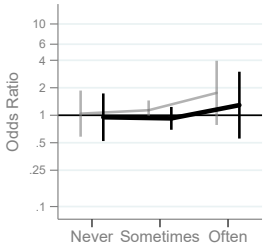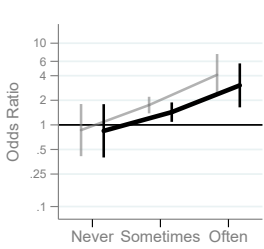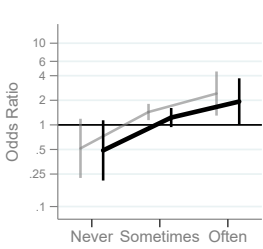

Shoulder

Arm

Hand

Hip

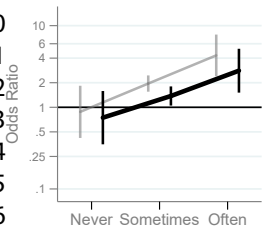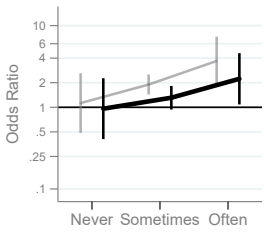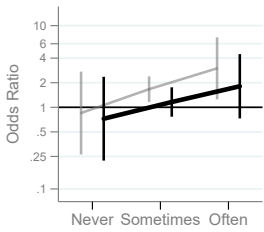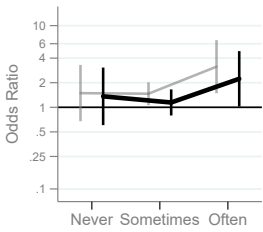

Leg

Foot

Head

Stomach

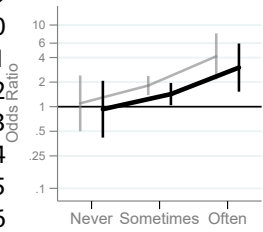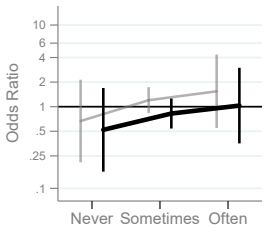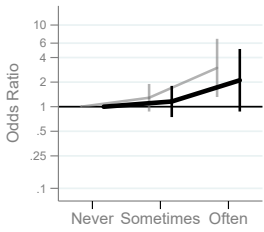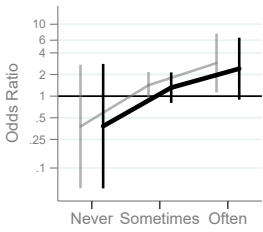

Adjusted for age and sex

Adjusted for age, sex, education, body mass index, insomnia, physical activity at work, leisure time physical activity and smoking

32

STROBE Statement—Checklist of items that should be included in reports of *cross-sectional studies*

|                              | Item No                                                                            | Recommendation                                                                                                                                                                                    | Page No       |
|------------------------------|------------------------------------------------------------------------------------|---------------------------------------------------------------------------------------------------------------------------------------------------------------------------------------------------|---------------|
| <b>Title and abstract</b>    | 1                                                                                  | (a) Indicate the study's design with a commonly used term in the title or the abstract                                                                                                            | 1             |
|                              |                                                                                    | (b) Provide in the abstract an informative and balanced summary of what was done and what was found                                                                                               | 2             |
| <b>Introduction</b>          |                                                                                    |                                                                                                                                                                                                   |               |
| Background/rationale         | 2                                                                                  | Explain the scientific background and rationale for the investigation being reported                                                                                                              | 4-5           |
| Objectives                   | 3                                                                                  | State specific objectives, including any prespecified hypotheses                                                                                                                                  | 5             |
| <b>Methods</b>               |                                                                                    |                                                                                                                                                                                                   |               |
| Study design                 | 4                                                                                  | Present key elements of study design early in the paper                                                                                                                                           | 6             |
| Setting                      | 5                                                                                  | Describe the setting, locations, and relevant dates, including periods of recruitment, exposure, follow-up, and data collection                                                                   | 6             |
| Participants                 | 6                                                                                  | (a) Give the eligibility criteria, and the sources and methods of selection of participants                                                                                                       | 6             |
| Variables                    | 7                                                                                  | Clearly define all outcomes, exposures, predictors, potential confounders, and effect modifiers. Give diagnostic criteria, if applicable                                                          | 6-7           |
| Data sources/<br>measurement | 8*                                                                                 | For each variable of interest, give sources of data and details of methods of assessment (measurement). Describe comparability of assessment methods if there is more than one group              | 7             |
| Bias                         | 9                                                                                  | Describe any efforts to address potential sources of bias                                                                                                                                         |               |
| Study size                   | 10                                                                                 | Explain how the study size was arrived at                                                                                                                                                         | 6, Fig 1      |
| Quantitative variables       | 11                                                                                 | Explain how quantitative variables were handled in the analyses. If applicable, describe which groupings were chosen and why                                                                      | 7             |
| Statistical methods          | 12                                                                                 | (a) Describe all statistical methods, including those used to control for confounding                                                                                                             | 8             |
|                              |                                                                                    | (b) Describe any methods used to examine subgroups and interactions                                                                                                                               |               |
|                              | (c) Explain how missing data were addressed                                        | 6                                                                                                                                                                                                 |               |
|                              | (d) If applicable, describe analytical methods taking account of sampling strategy | -                                                                                                                                                                                                 |               |
|                              | (e) Describe any sensitivity analyses                                              | -                                                                                                                                                                                                 |               |
| <b>Results</b>               |                                                                                    |                                                                                                                                                                                                   |               |
| Participants                 | 13*                                                                                | (a) Report numbers of individuals at each stage of study—eg numbers potentially eligible, examined for eligibility, confirmed eligible, included in the study, completing follow-up, and analysed | 9             |
|                              |                                                                                    | (b) Give reasons for non-participation at each stage                                                                                                                                              | Fig 1         |
|                              |                                                                                    | (c) Consider use of a flow diagram                                                                                                                                                                | Fig 1         |
| Descriptive data             | 14*                                                                                | (a) Give characteristics of study participants (eg demographic, clinical, social) and information on exposures and potential confounders                                                          | 9<br>tab 1    |
|                              |                                                                                    | (b) Indicate number of participants with missing data for each variable of interest                                                                                                               | -             |
| Outcome data                 | 15*                                                                                | Report numbers of outcome events or summary measures                                                                                                                                              | 10<br>Table 2 |

1  
2  
3  
4  
5  
6  
7  
8  
9  
10  
11  
12  
13  
14  
15  
16  
17  
18  
19  
20  
21  
22  
23  
24  
25  
26  
27  
28  
29  
30  
31  
32  
33  
34  
35  
36  
37  
38  
39  
40  
41  
42  
43  
44  
45  
46  
47  
48  
49  
50  
51  
52  
53  
54  
55  
56  
57  
58  
59  
60

|                          |    |                                                                                                                                                                                                              |          |
|--------------------------|----|--------------------------------------------------------------------------------------------------------------------------------------------------------------------------------------------------------------|----------|
| Main results             | 16 | (a) Give unadjusted estimates and, if applicable, confounder-adjusted estimates and their precision (eg, 95% confidence interval). Make clear which confounders were adjusted for and why they were included | 11-12    |
|                          |    | (b) Report category boundaries when continuous variables were categorized                                                                                                                                    | 7, tab 1 |
|                          |    | (c) If relevant, consider translating estimates of relative risk into absolute risk for a meaningful time period                                                                                             | -        |
| Other analyses           | 17 | Report other analyses done—eg analyses of subgroups and interactions, and sensitivity analyses                                                                                                               | 11-12    |
| <b>Discussion</b>        |    |                                                                                                                                                                                                              |          |
| Key results              | 18 | Summarise key results with reference to study objectives                                                                                                                                                     | 14       |
| Limitations              | 19 | Discuss limitations of the study, taking into account sources of potential bias or imprecision. Discuss both direction and magnitude of any potential bias                                                   | 14-17    |
| Interpretation           | 20 | Give a cautious overall interpretation of results considering objectives, limitations, multiplicity of analyses, results from similar studies, and other relevant evidence                                   | 14-15    |
| Generalisability         | 21 | Discuss the generalisability (external validity) of the study results                                                                                                                                        | 17       |
| <b>Other information</b> |    |                                                                                                                                                                                                              |          |
| Funding                  | 22 | Give the source of funding and the role of the funders for the present study and, if applicable, for the original study on which the present article is based                                                |          |

\*Give information separately for exposed and unexposed groups.

**Note:** An Explanation and Elaboration article discusses each checklist item and gives methodological background and published examples of transparent reporting. The STROBE checklist is best used in conjunction with this article (freely available on the Web sites of PLoS Medicine at <http://www.plosmedicine.org/>, Annals of Internal Medicine at <http://www.annals.org/>, and Epidemiology at <http://www.epidem.com/>). Information on the STROBE Initiative is available at [www.strobe-statement.org](http://www.strobe-statement.org).
